# Supplementary material for: Epidemiology of Microsatellite Instability High (MSI-H) and Deficient Mismatch Repair (dMMR) in Solid Tumors: A Structured Literature Review
Source: Hindawi journal article supplement (doi:10.1155/2020/1807929), 2020-03-09

## **SUPPLEMENTARY INFORMATION**

### **Epidemiology of microsatellite instability high (MSI-H) and deficient mismatch repair (dMMR) in solid tumors – A structured literature review**

Maria Lorenzi<sup>1</sup>, Mayur Amonkar<sup>2</sup>, Jacky Zhang<sup>1</sup>, Shivani Mehta<sup>1</sup>, Kai-Li Liaw<sup>2</sup>,

<sup>1</sup>Precision Xtract, Oakland, CA, USA; <sup>2</sup>Merck & Co, Inc., North Wales, NJ, USA

**Appendix Figure 1: Meta-analysis, MSI-H, random effects model, all tumor types, overall (without genomic studies), part 1 of 2**

**MSI-H, without genomic studies, all tumor types, random effects**

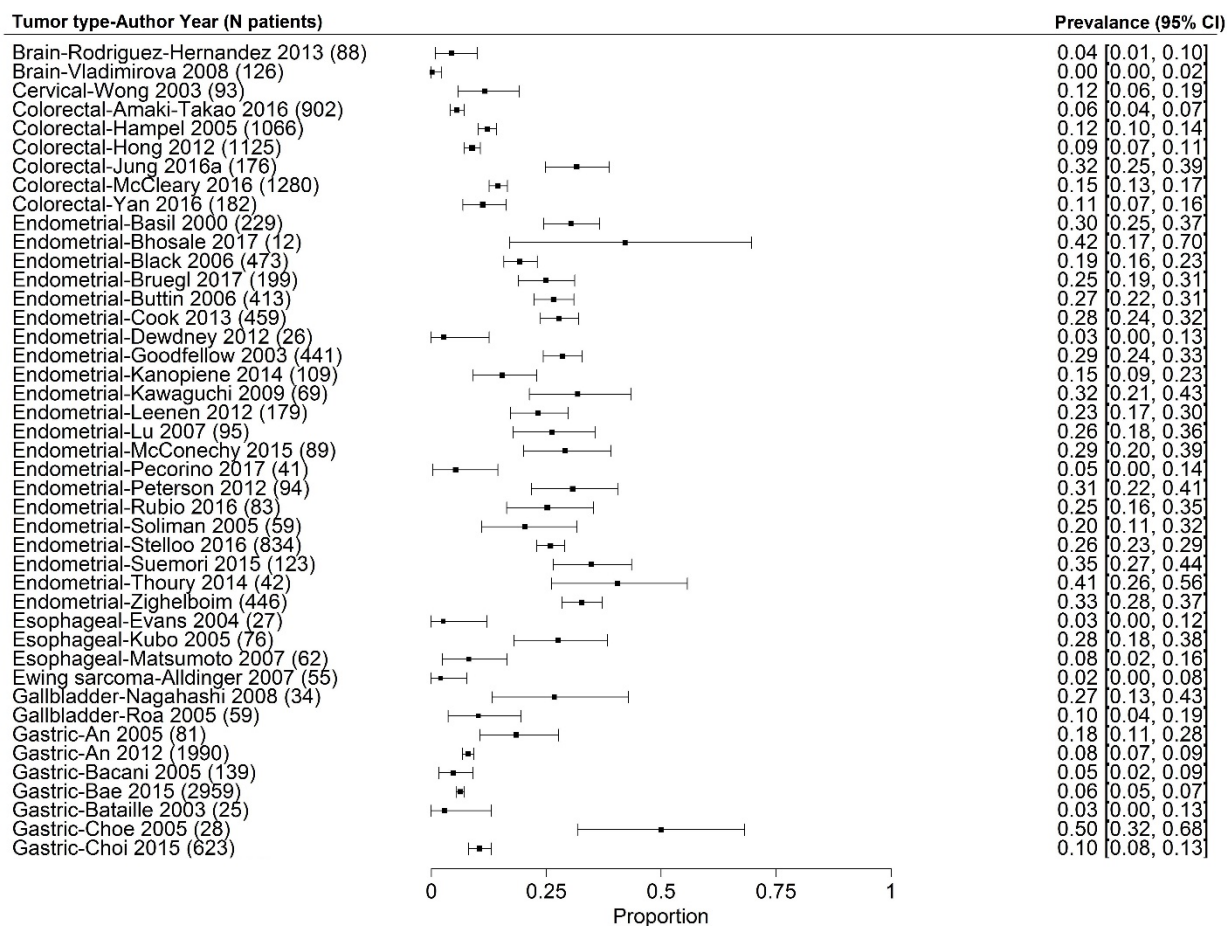

**Appendix Figure 2: Meta-analysis, MSI-H, random effects model, all tumor types, overall (without genomic studies), part 2 of 2**

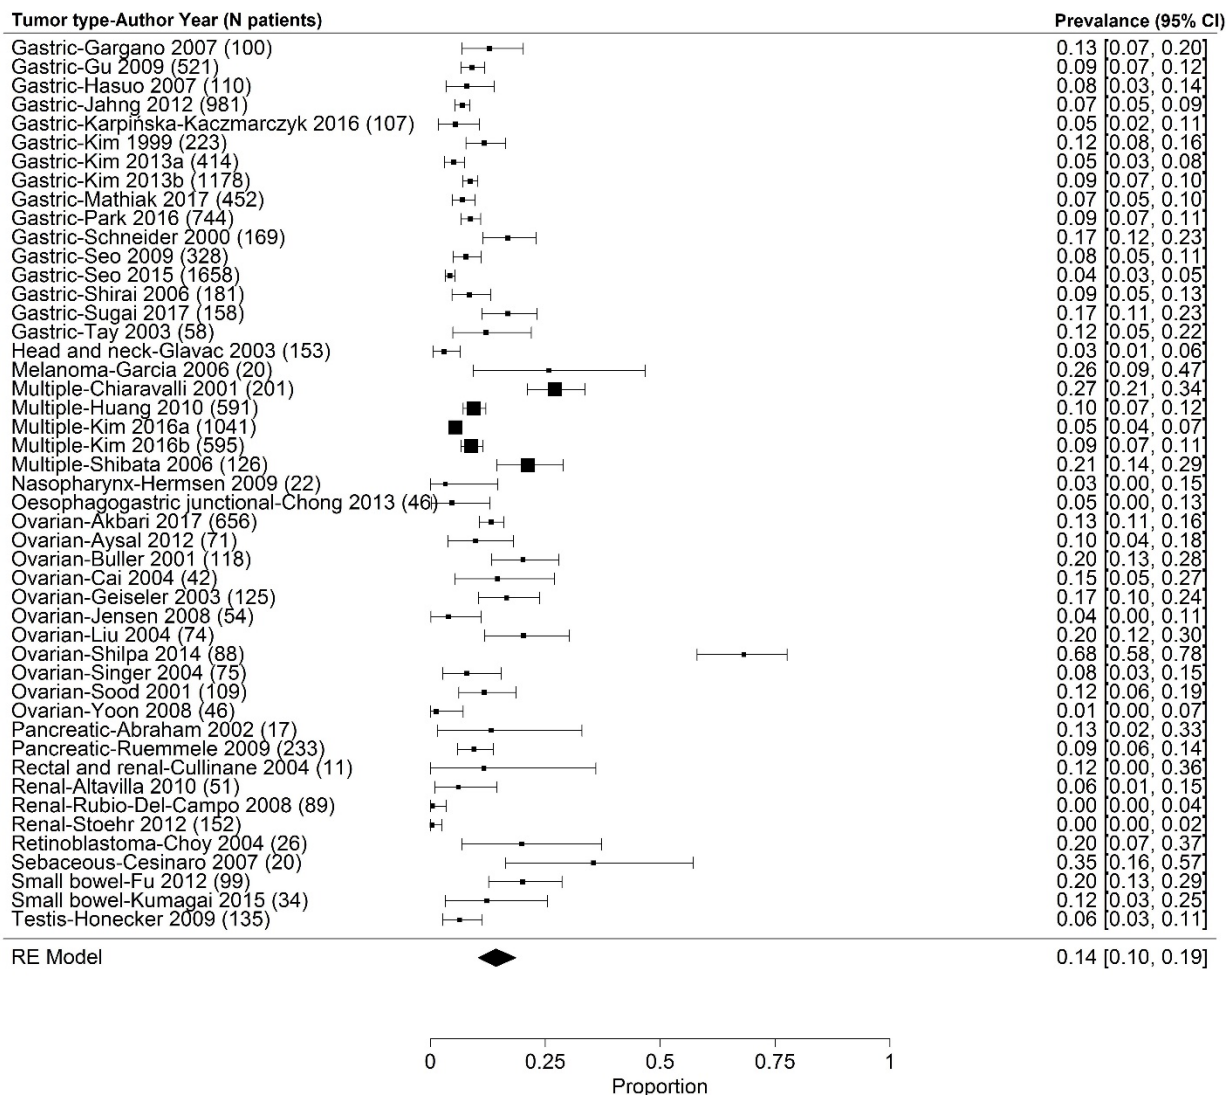

**Appendix Figure 3: Meta-analysis, MSI-H, random effects model, all tumor types, overall (with genomic studies), part 1 of 2**

**MSI-H, with genomic studies, all tumor types, random effects**

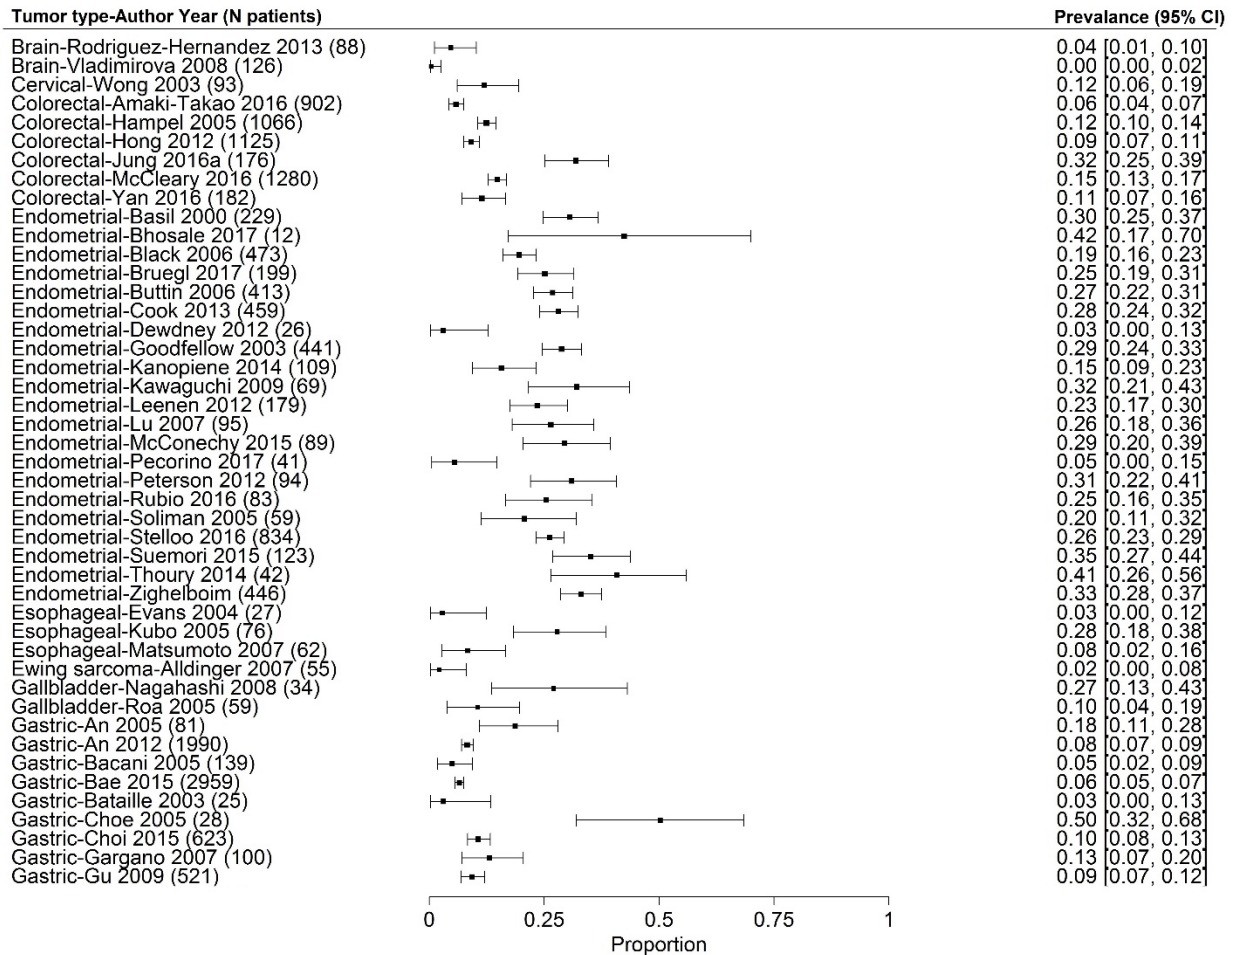



# **Appendix Figure 4: Meta-analysis, MSI-H, random effects model, all tumor types, overall (with genomic studies), part 2 of 2**

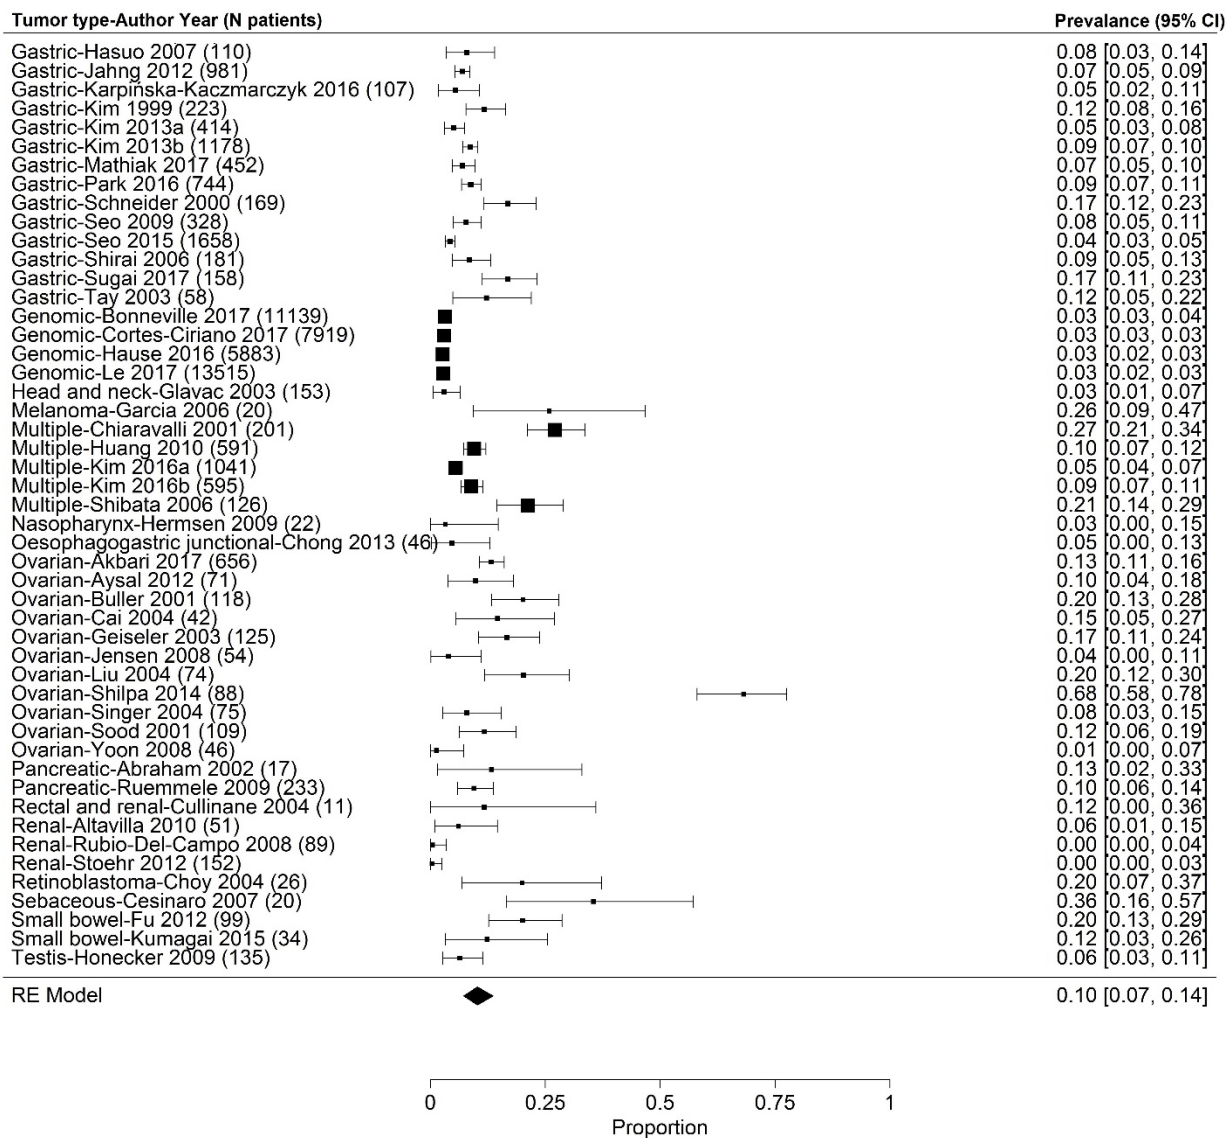

# Appendix Figure 5: Meta-analysis, MSI-H, random effects model, all tumor types, United States

## MSI-H, United States, all tumor types, random effects

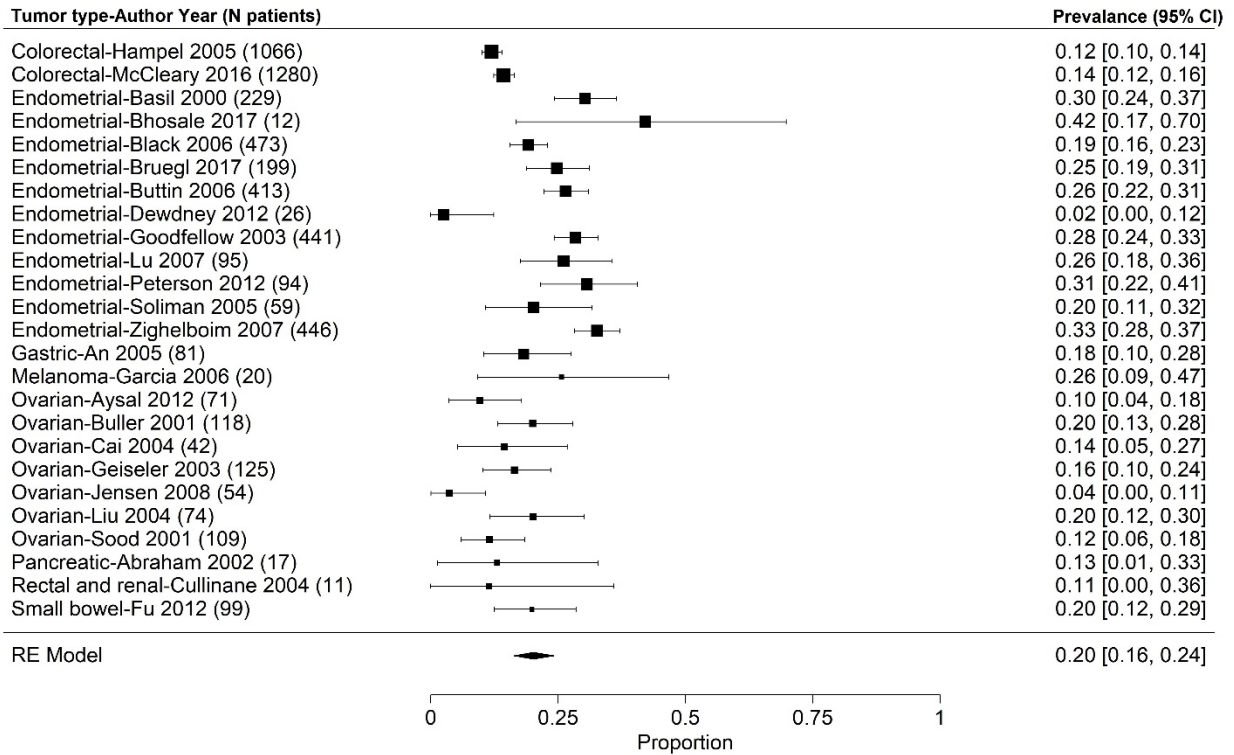

## Appendix Figure 6: Meta-analysis, MSI-H, random effects model, all tumor types, Korea

### MSI-H, Korea, all tumor types, random effects

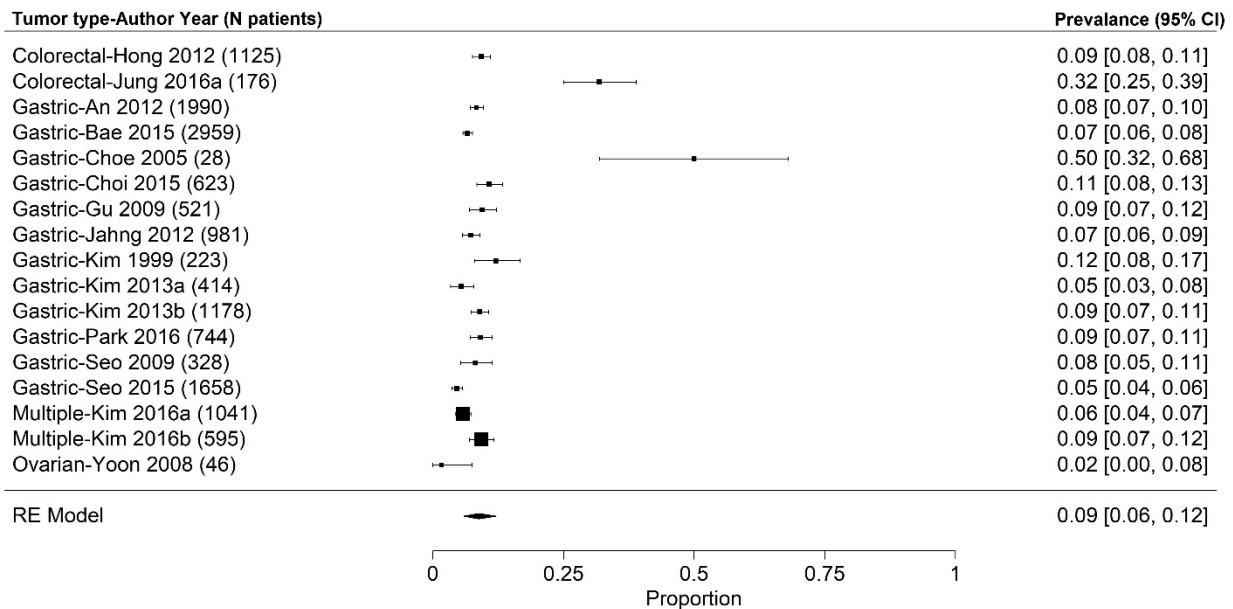

## Appendix Figure 7: Meta-analysis, MSI-H, random effects model, all tumor types, Japan

### MSI-H, Japan, all tumor types, random effects

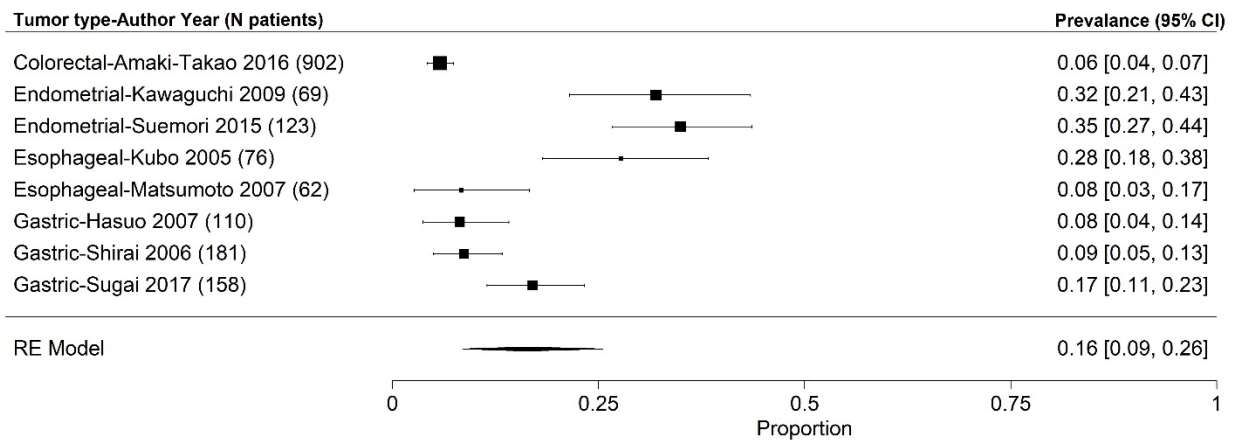

## Appendix Figure 8: Meta-analysis, MSI-H, random effects model, all tumor types, stage 1

### MSI-H, stage 1, all tumor types, random effects

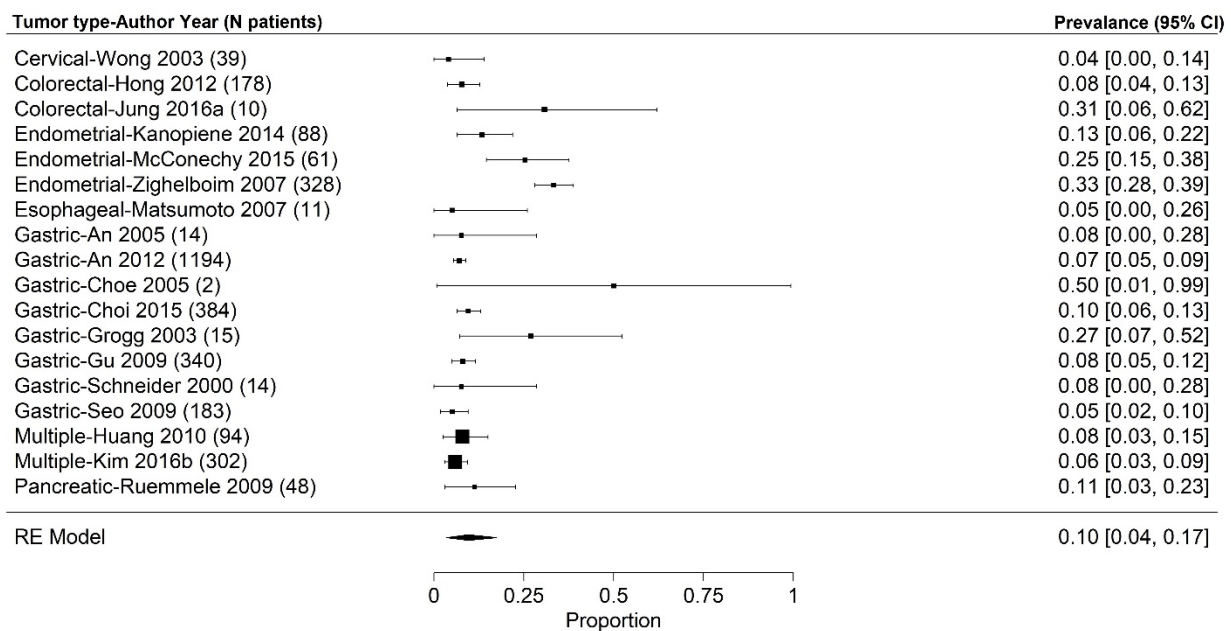

## Appendix Figure 9: Meta-analysis, MSI-H, random effects model, all tumor types, stage 2

### MSI-H, stage 2, all tumor types, random effects

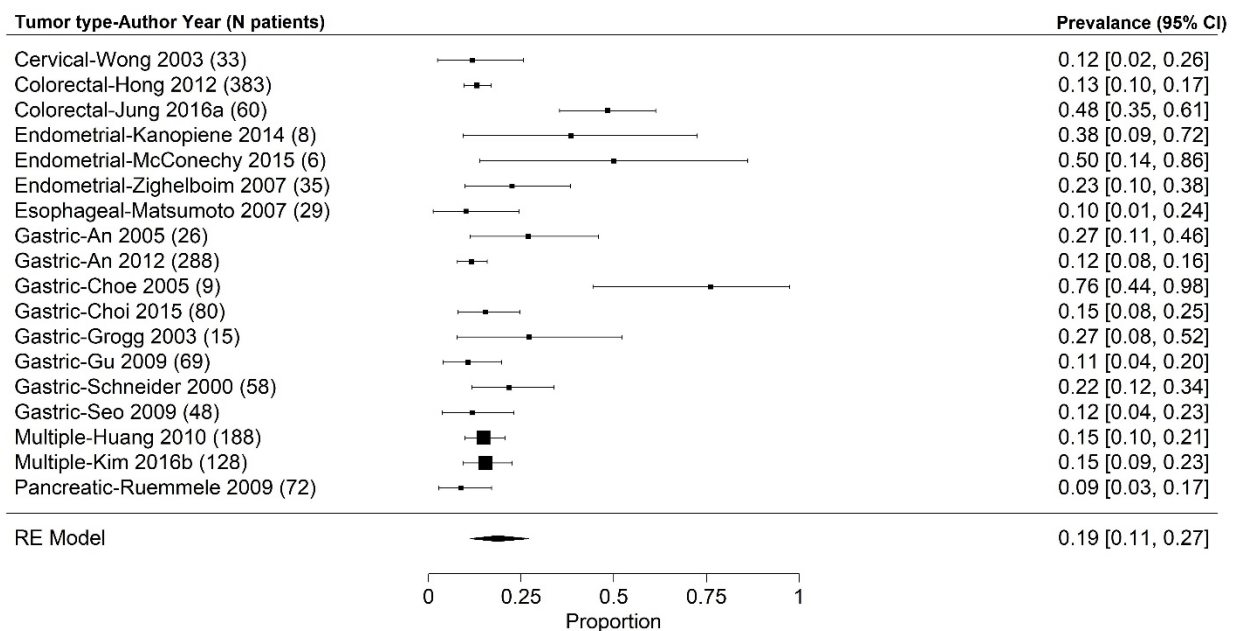

## Appendix Figure 10: Meta-analysis, MSI-H, random effects model, all tumor types, stage 3

### MSI-H, stage 3, all tumor types, random effects

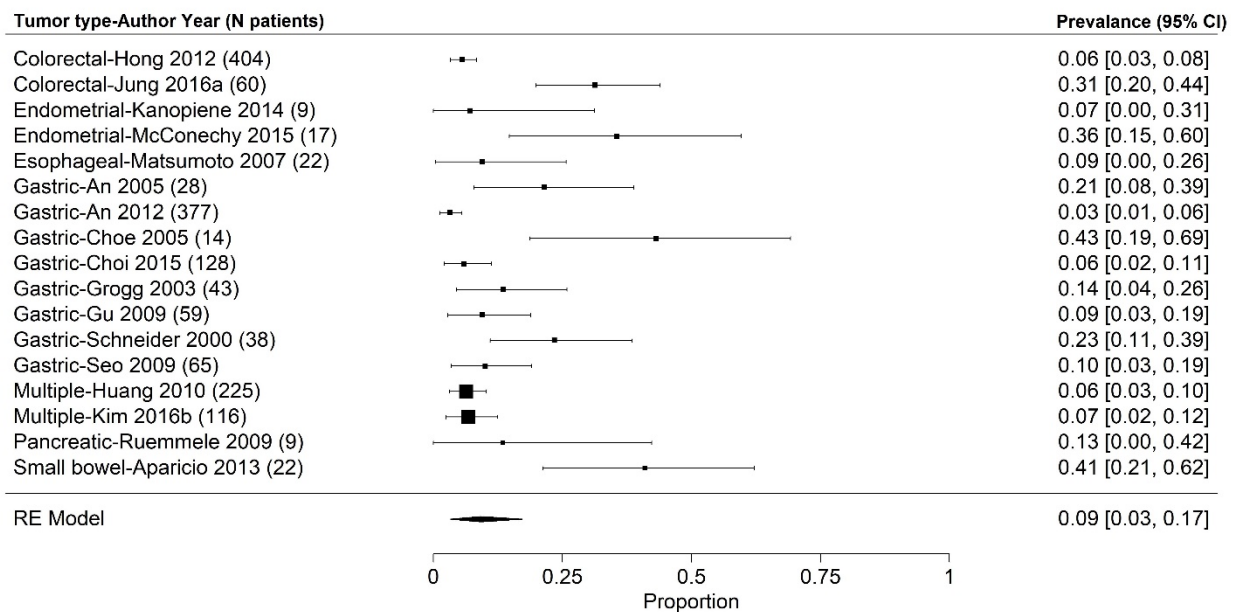

## Appendix Figure 11: Meta-analysis, MSI-H, random effects model, all tumor types, stage 4

### MSI-H, stage 4, all tumor types, random effects

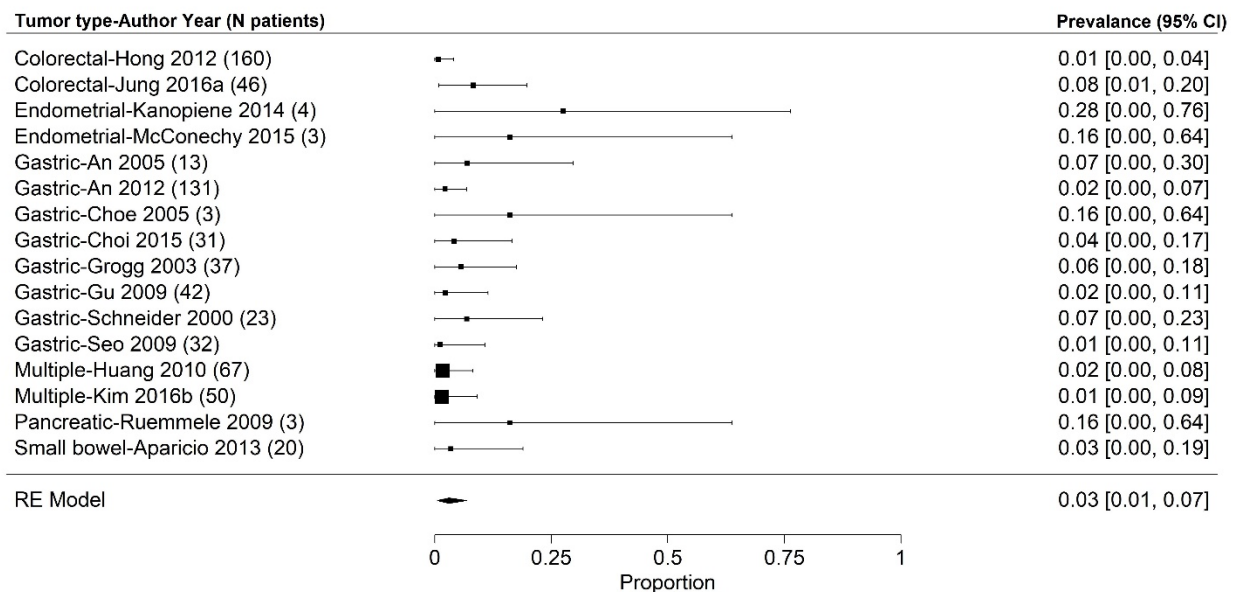



**Appendix Figure 12: Meta-analysis, MSI-H, random effects model, all tumor types, stage 1-2**

**MSI-H, stage 1-2, all tumor types, random effects**

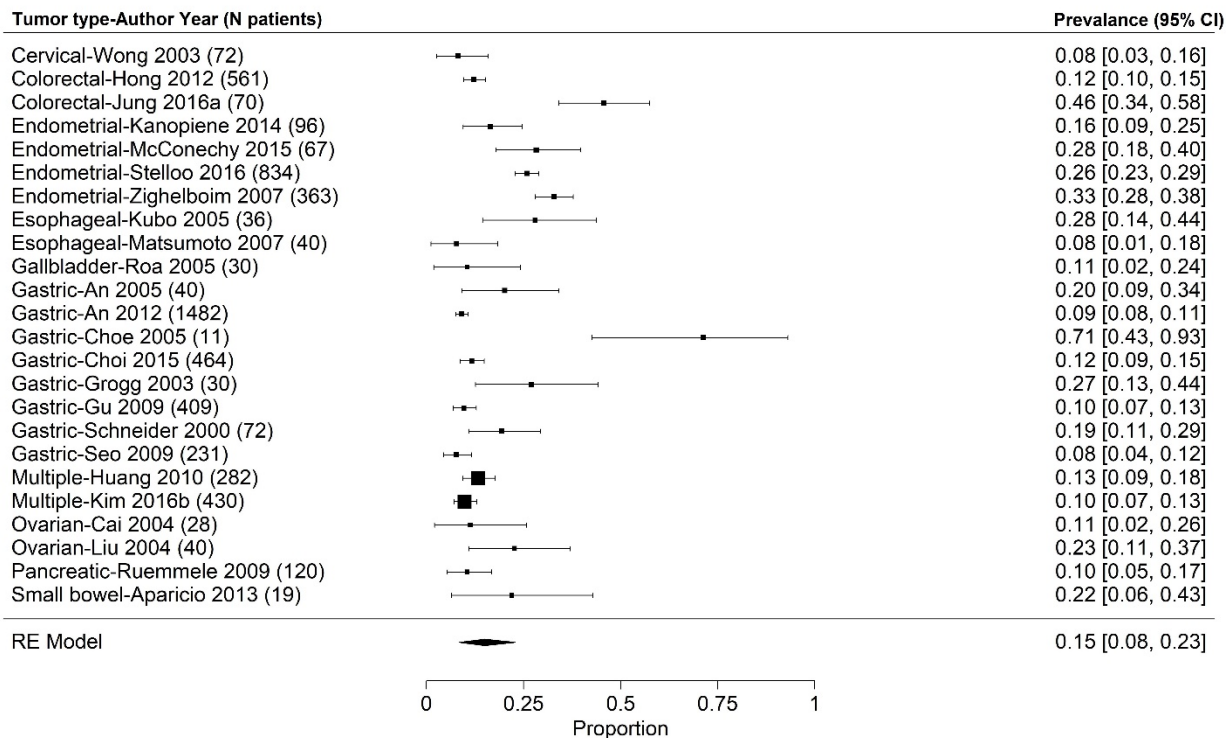



# Appendix Figure 13: Meta-analysis, MSI-H, random effects model, all tumor types, stage 3-4

## MSI-H, stage 3-4, all tumor types, random effects

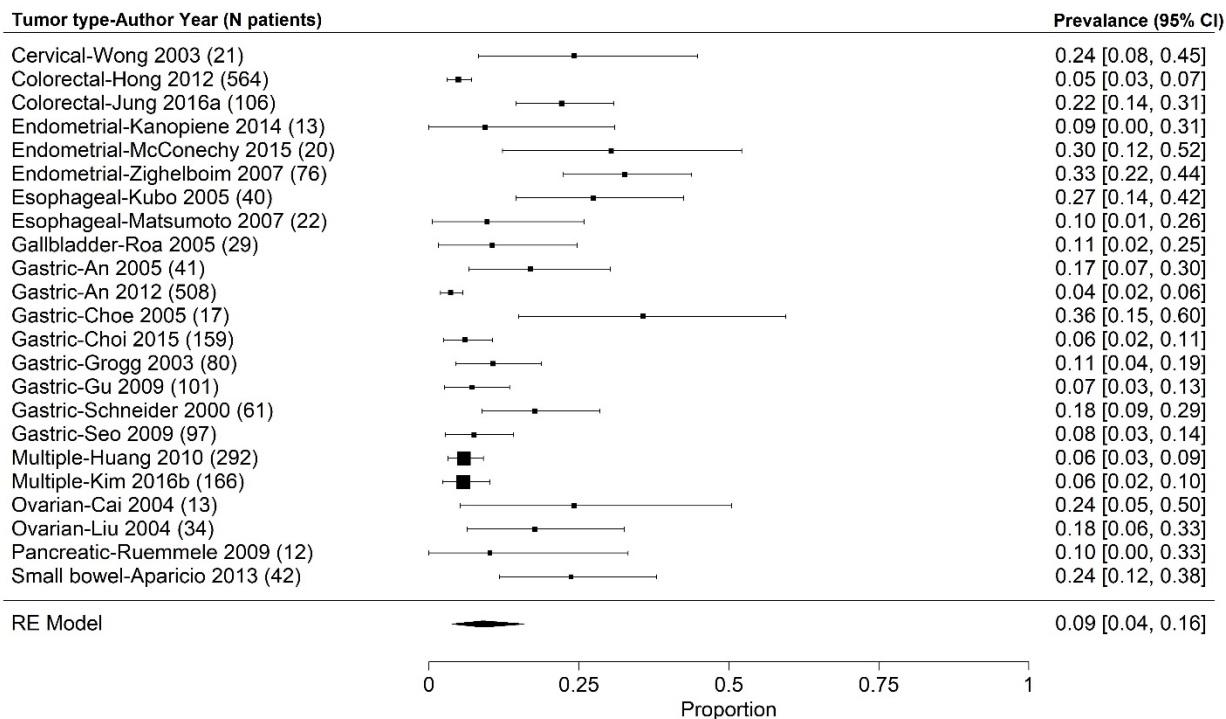

# Appendix Figure 14: Meta-analysis, dMMR, random effects model, all tumor types, overall

## dMMR, all tumor types, random effects

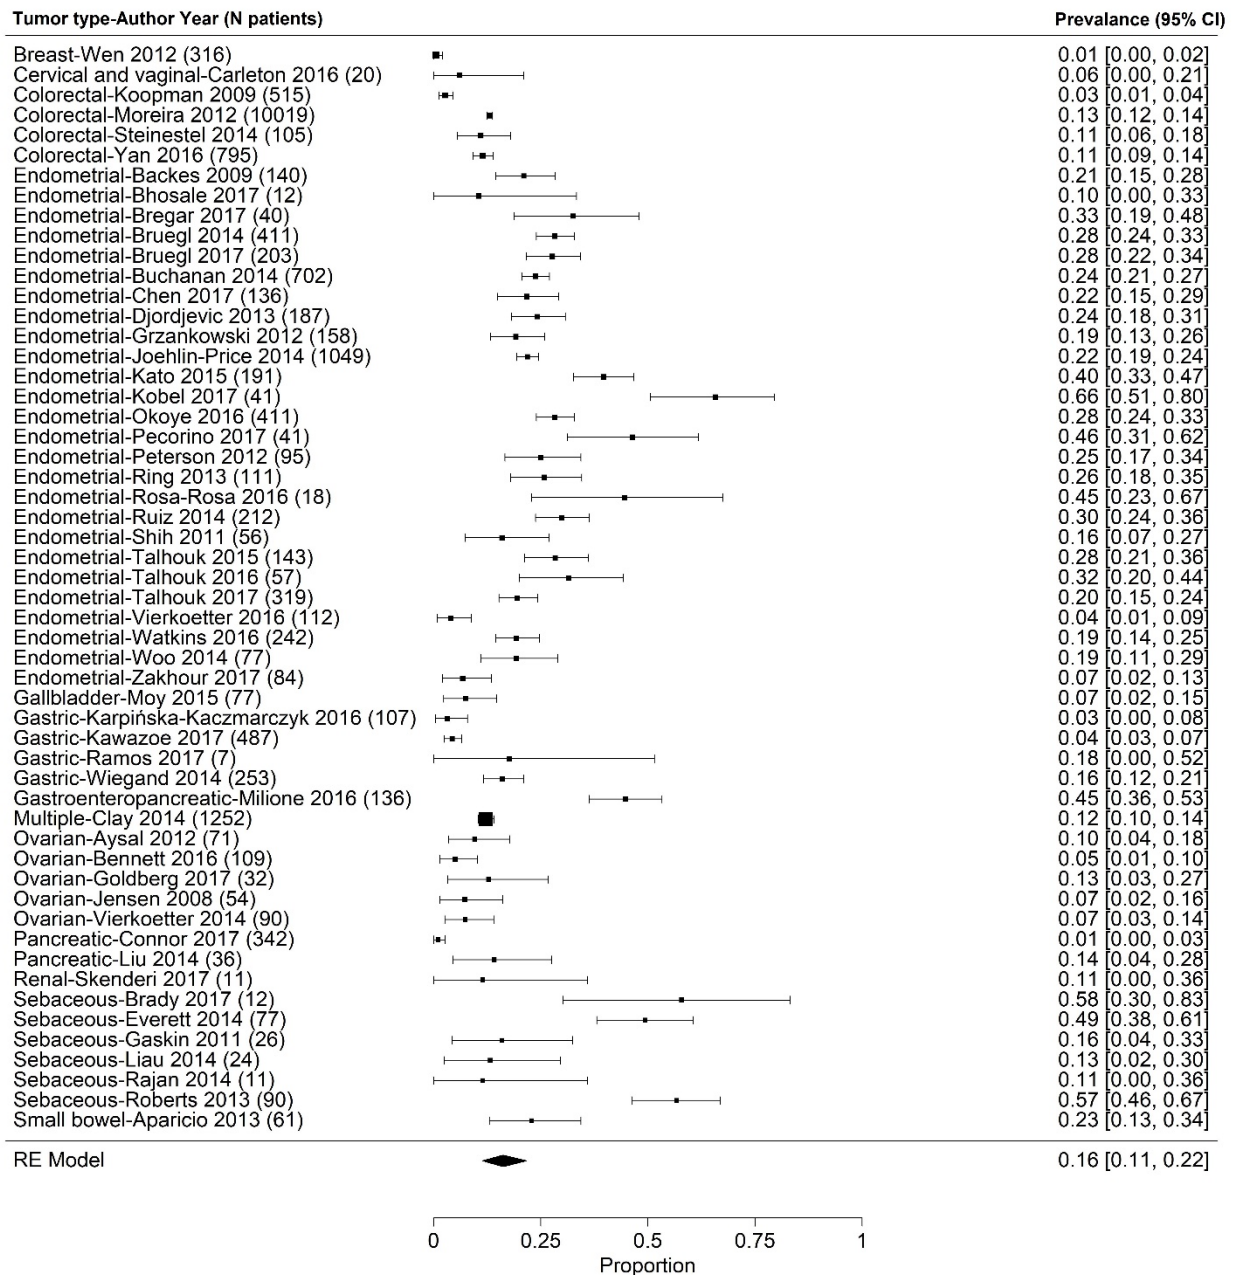

# Appendix Figure 15: Meta-analysis, dMMR, random effects model, all tumor types, overall (sensitivity)

## dMMR, sensitivity, all tumor types, random effects

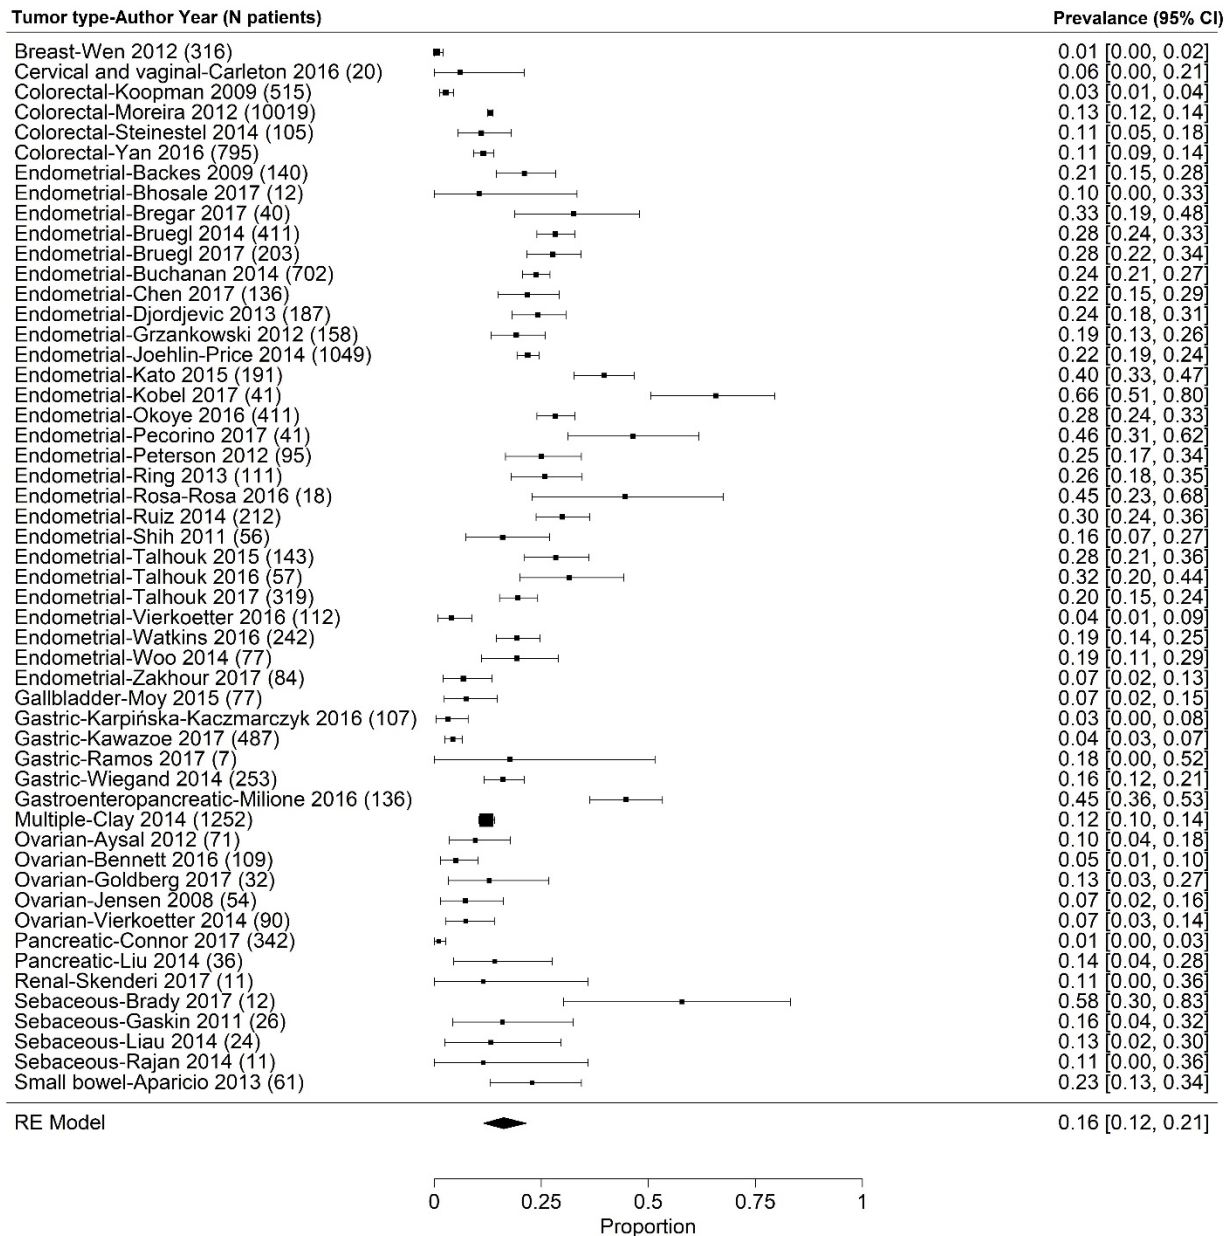

# Appendix Figure 16: Meta-analysis, dMMR, random effects model, all tumor types, United States

## dMMR, United States, all tumor types, random effects

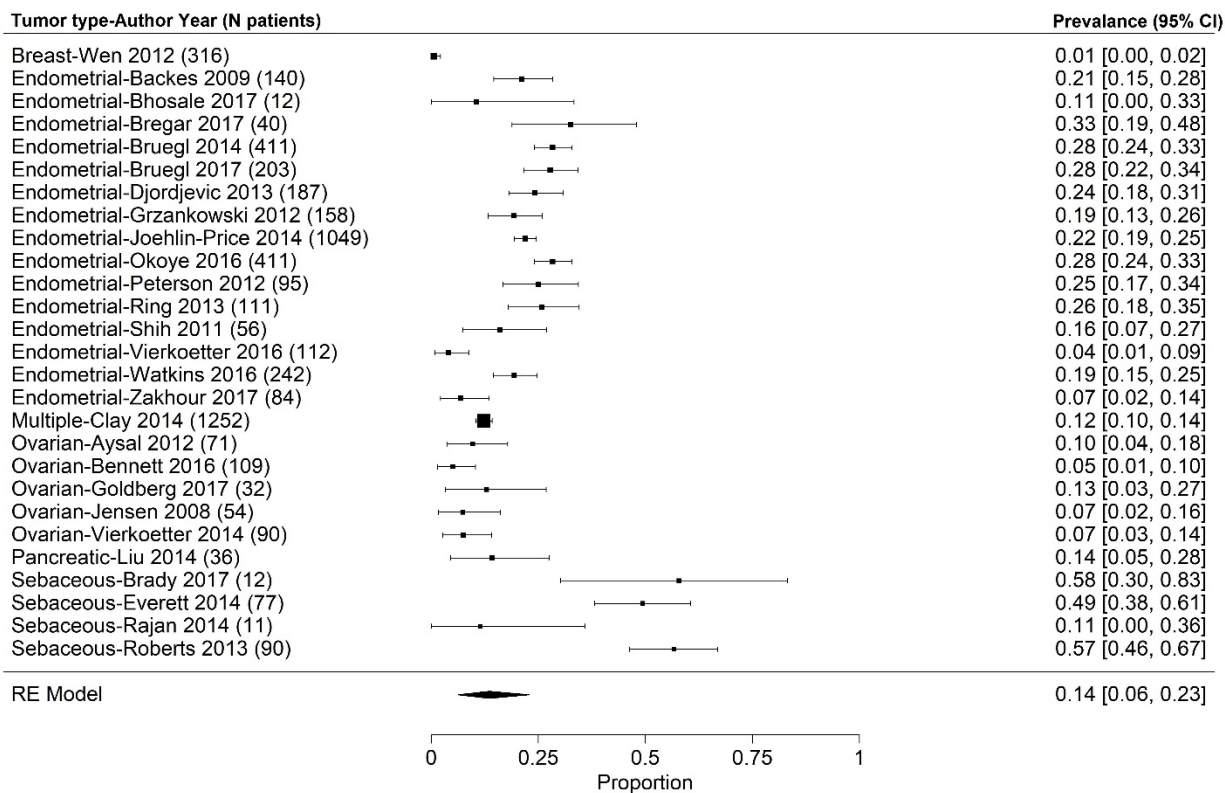

# Appendix Figure 17: Meta-analysis, dMMR, random effects model, all tumor types, United States (sensitivity)

## dMMR, United States, sensitivity, all tumor types, random effects

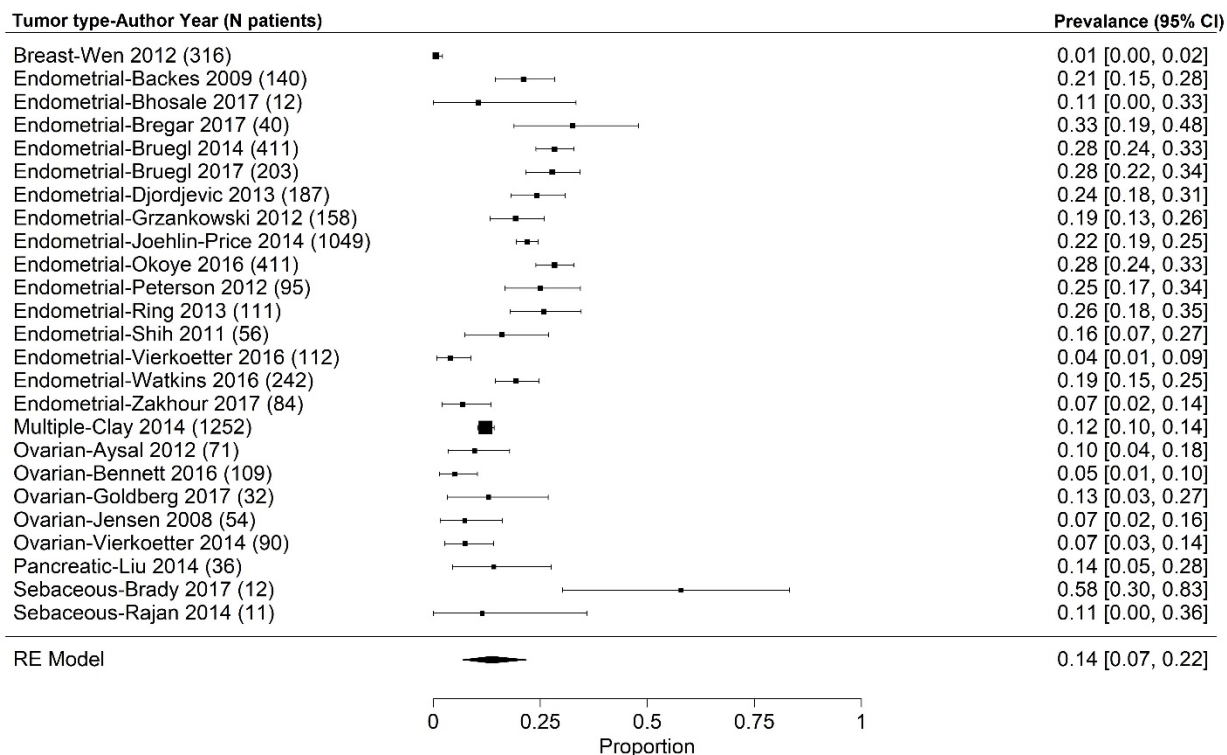

# Appendix Figure 18: Meta-analysis, dMMR, random effects model, all tumor types, Japan

## dMMR, Japan, all tumor types, random effects

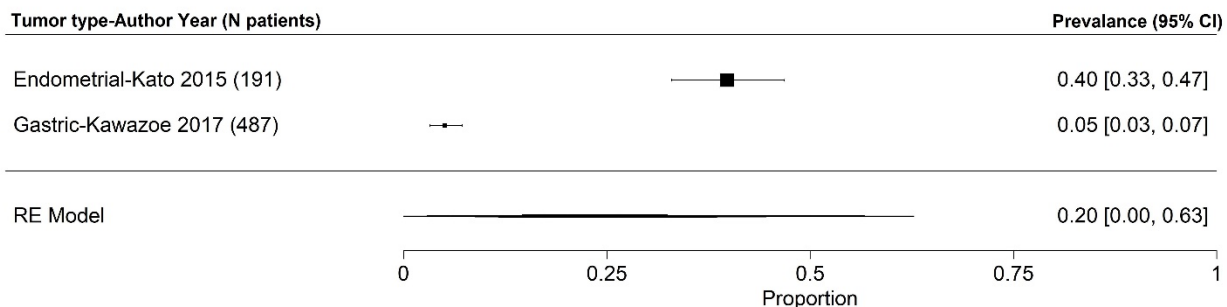



**Appendix Figure 19: Meta-analysis, MSI-H/dMMR, random effects model, all tumor types, overall (without genomic studies), part 1 of 3**

**MSI-H/dMMR, without genomic studies, all tumor types, random effects**

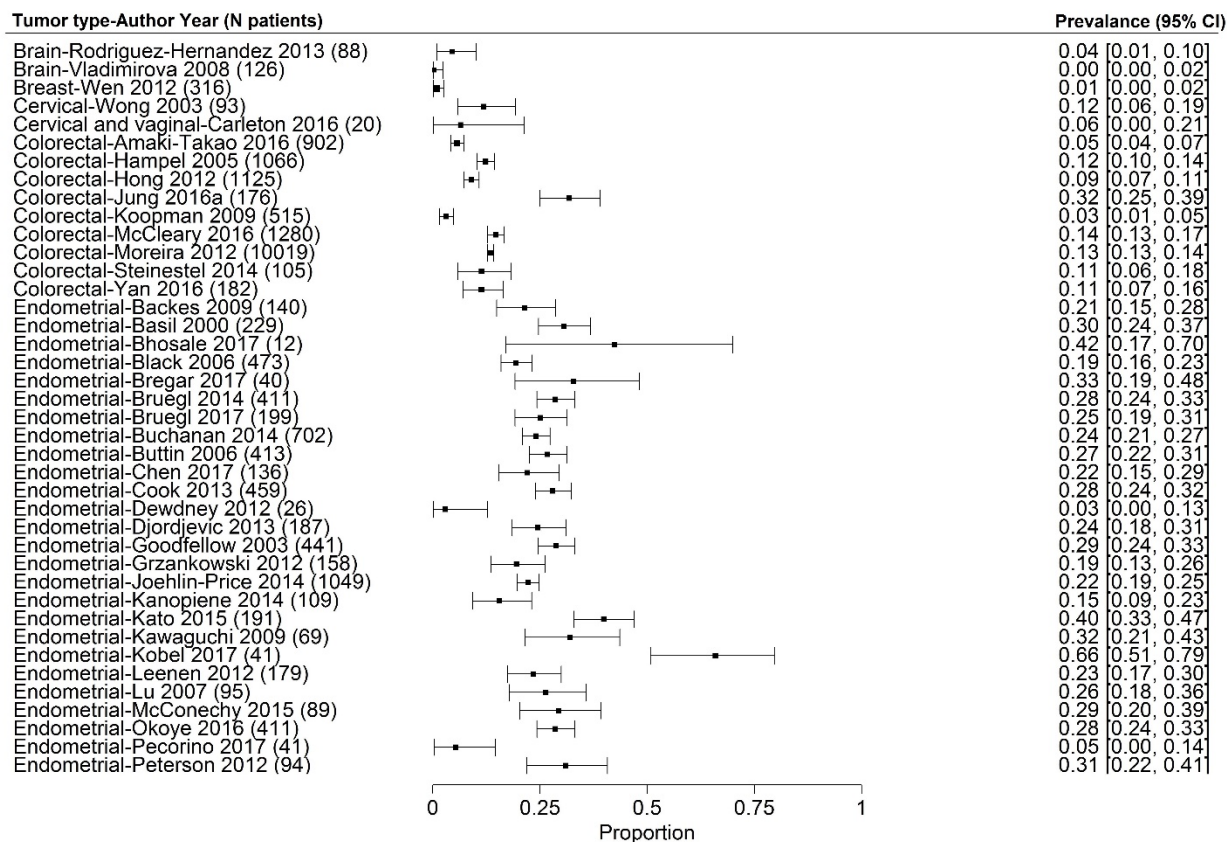



**Appendix Figure 20: Meta-analysis, MSI-H/dMMR, random effects model, all tumor types, overall (without genomic studies), part 2 of 3**

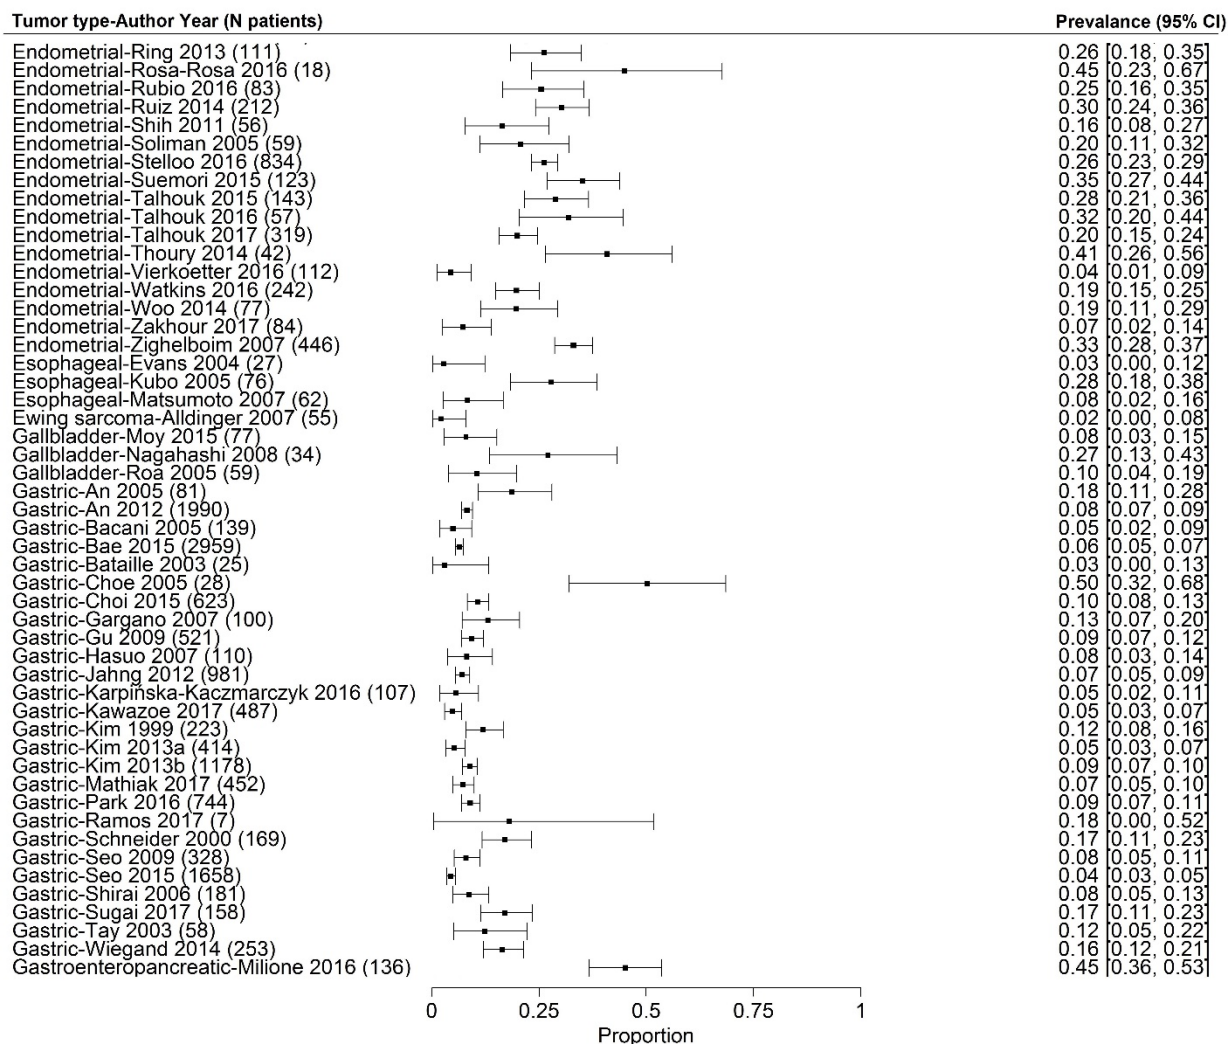

**Appendix Figure 21: Meta-analysis, MSI-H/dMMR, random effects model, all tumor types, overall (without genomic studies), part 3 of 3**

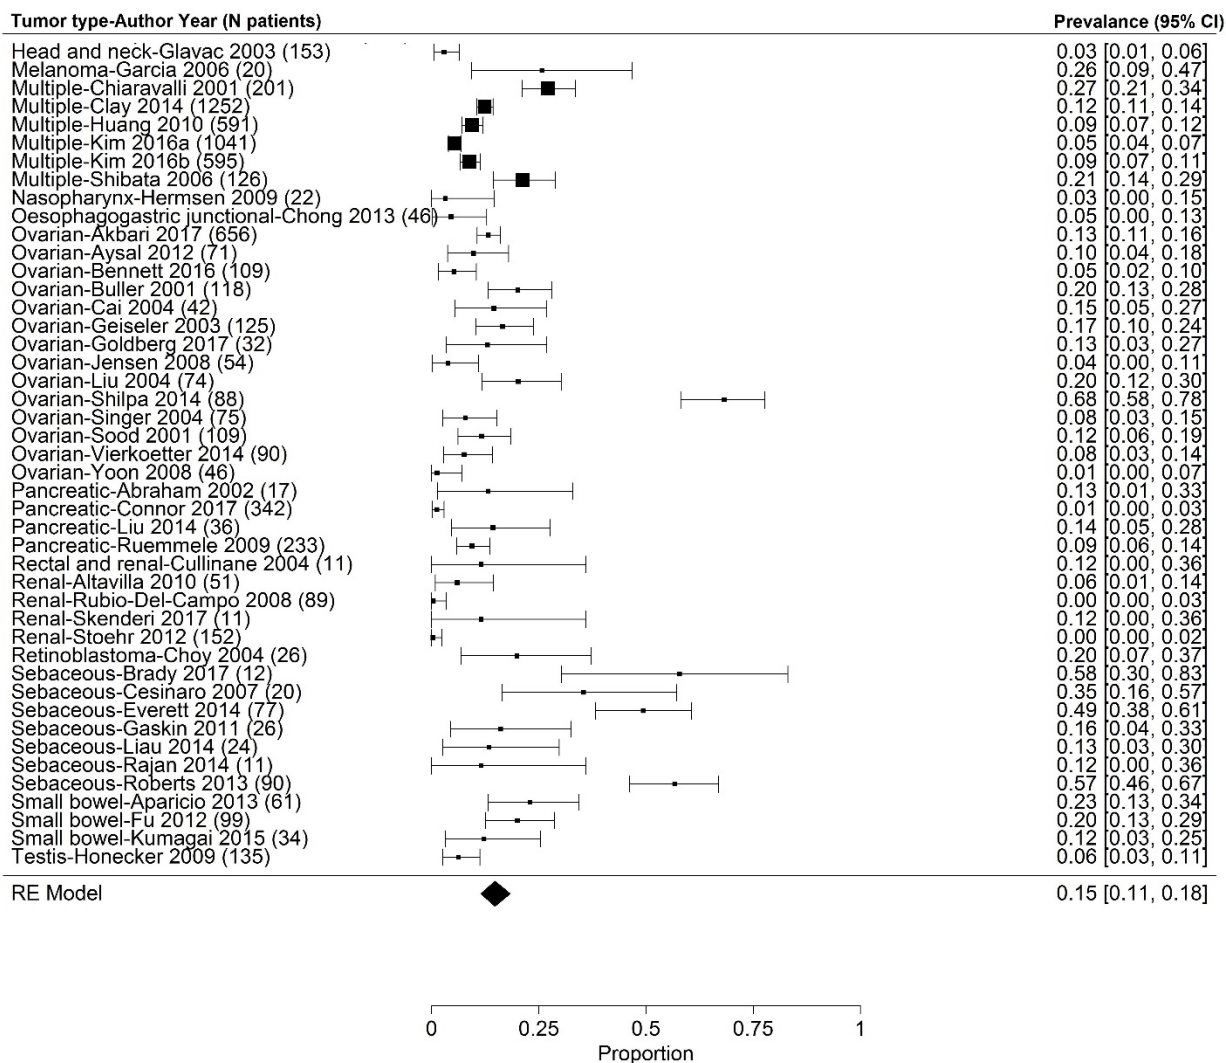

**Appendix Figure 22: Meta-analysis, MSI-H/dMMR, random effects model, all tumor types, overall (with genomic studies), part 1 of 3**

**MSI-H/dMMR, with genomic studies, all tumor types, random effects**

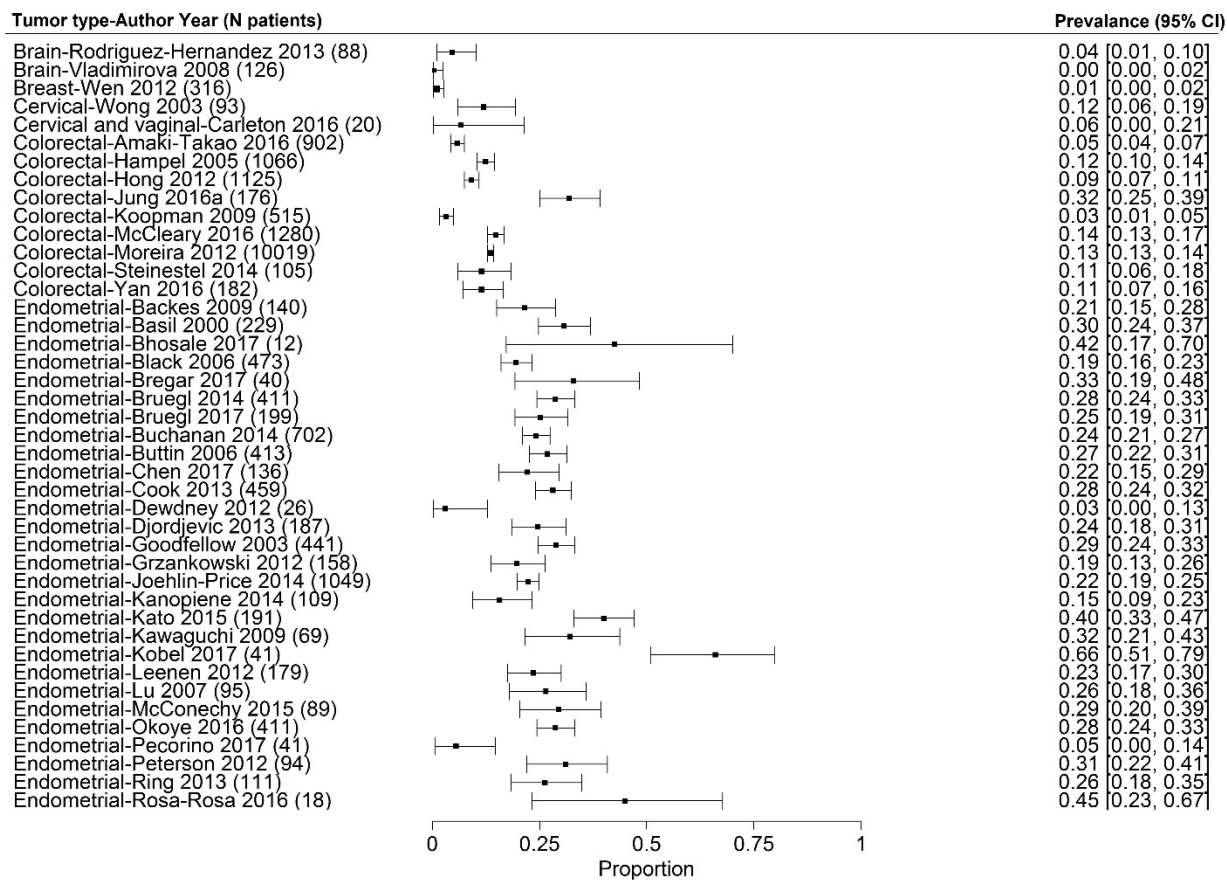

**Appendix Figure 23: Meta-analysis, MSI-H/dMMR, random effects model, all tumor types, overall (with genomic studies), part 2 of 3**

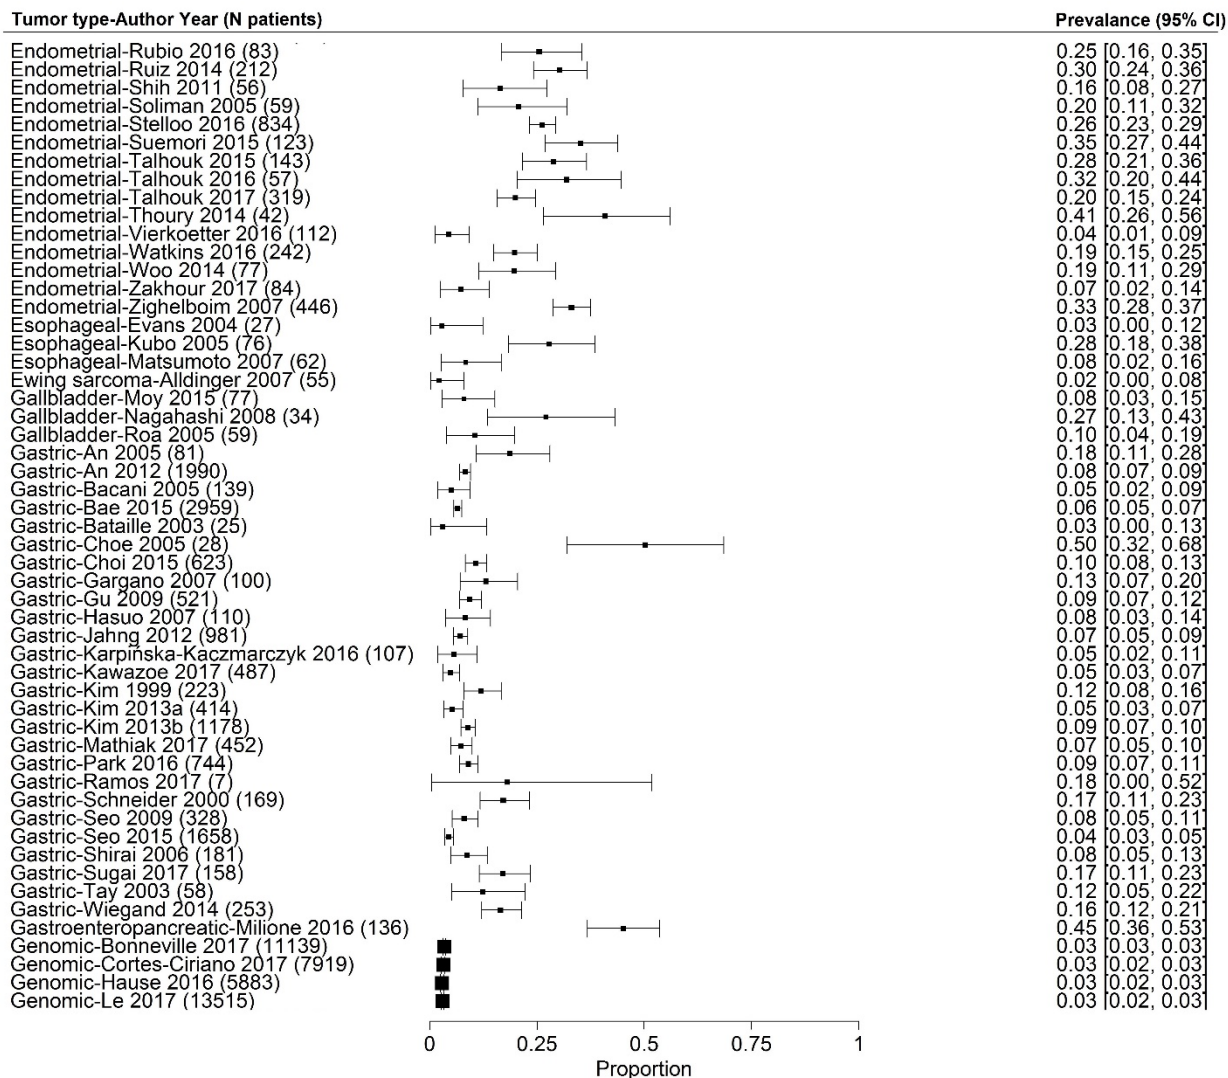



**Appendix Figure 24: Meta-analysis, MSI-H/dMMR, random effects model, all tumor types, overall (with genomic studies), part 3 of 3**

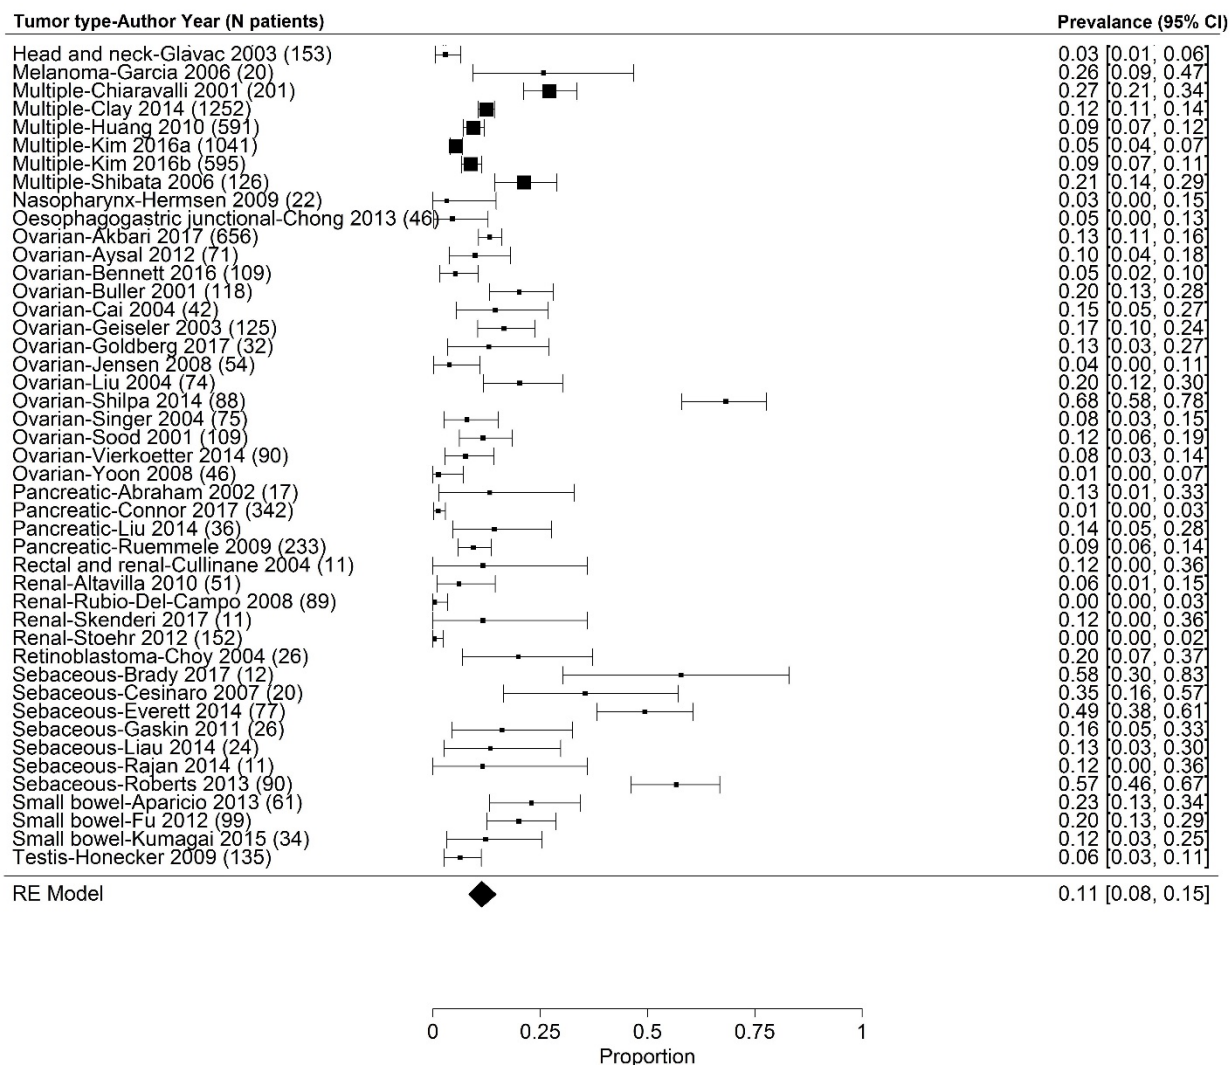

**Appendix Figure 25: Meta-analysis, MSS, random effects model, all tumor types, overall, part 1 of 2**

**MSS, all tumor types, random effects**

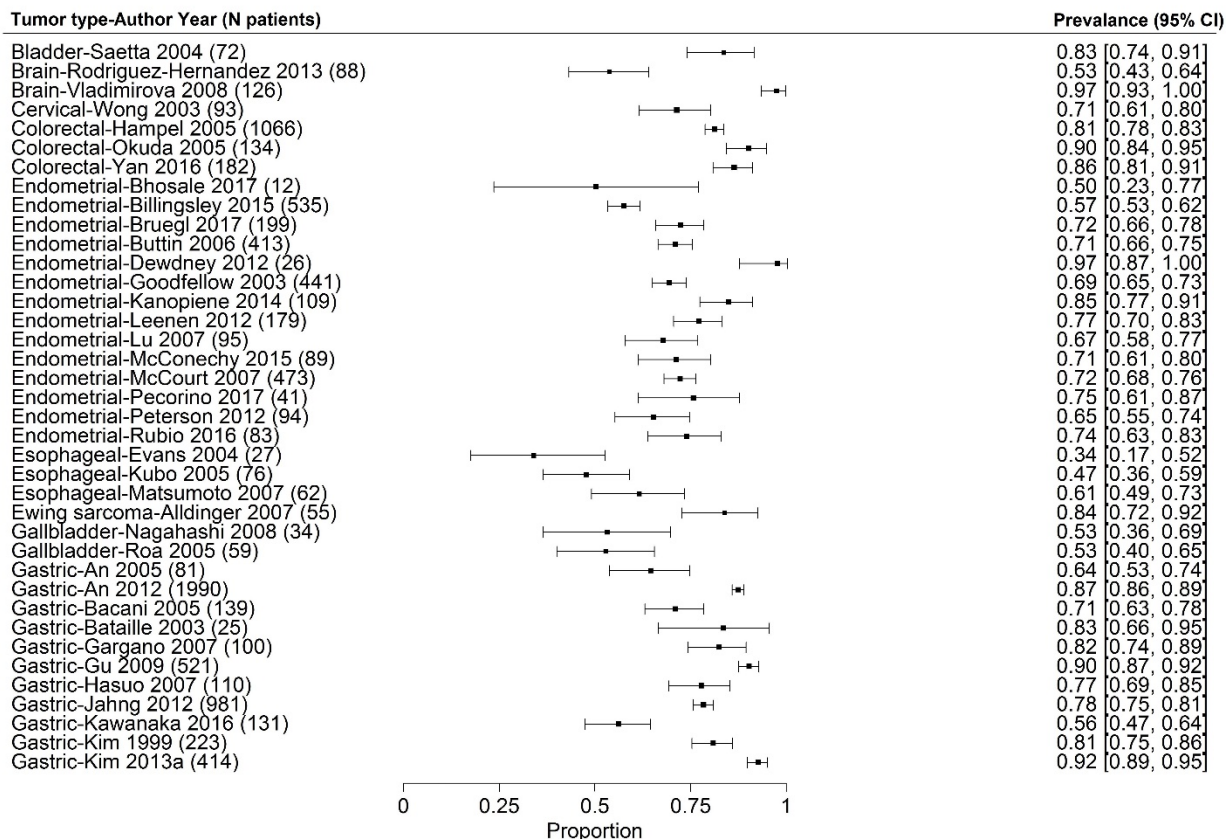



**Appendix Figure 26: Meta-analysis, MSS, random effects model, all tumor types, overall, part 2 of 2**

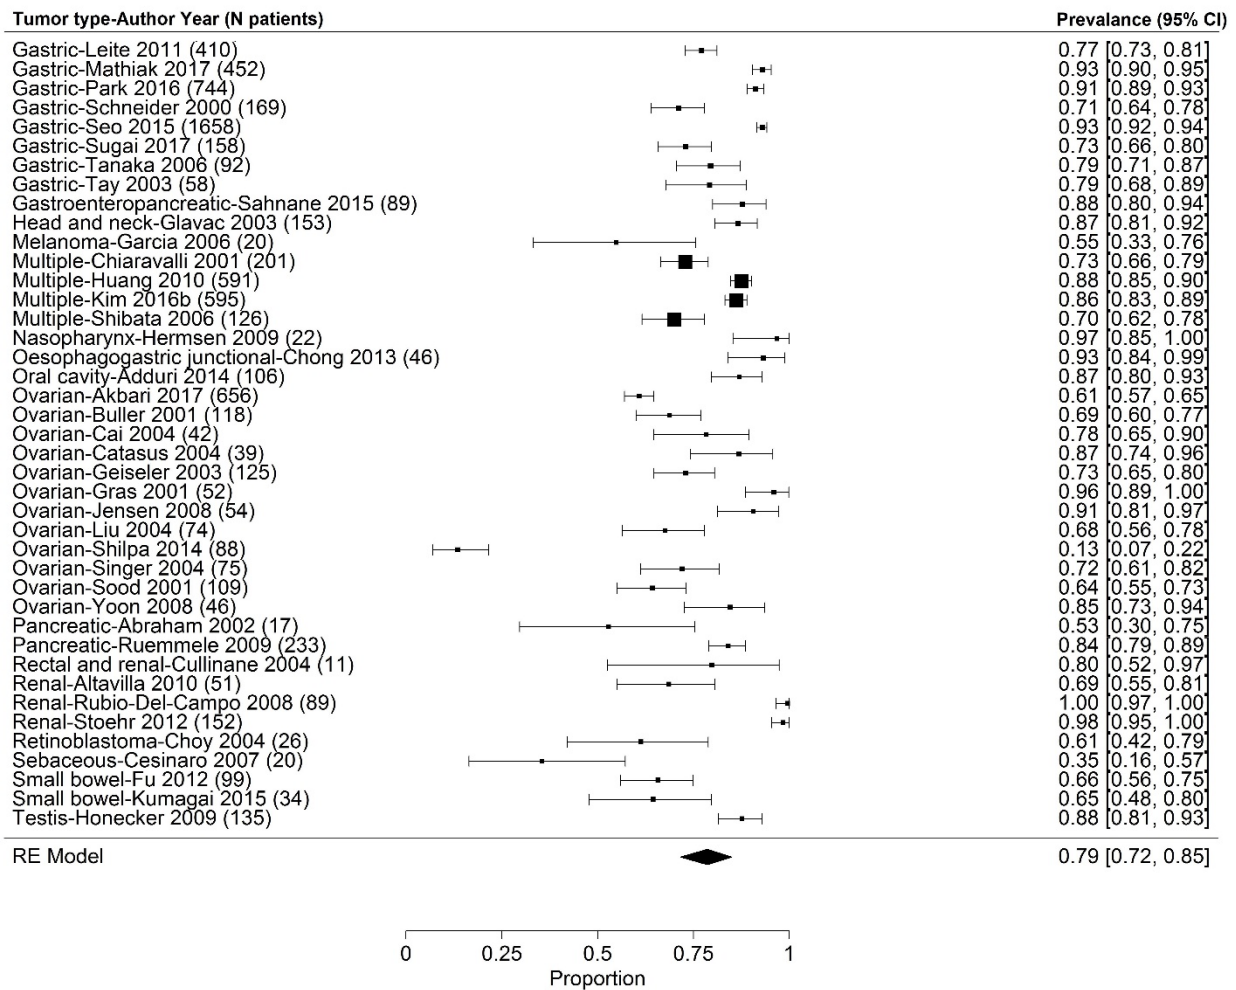

**Appendix Figure 27: Funnel plot, MSI-H, all tumor types, overall (without genomic studies)**

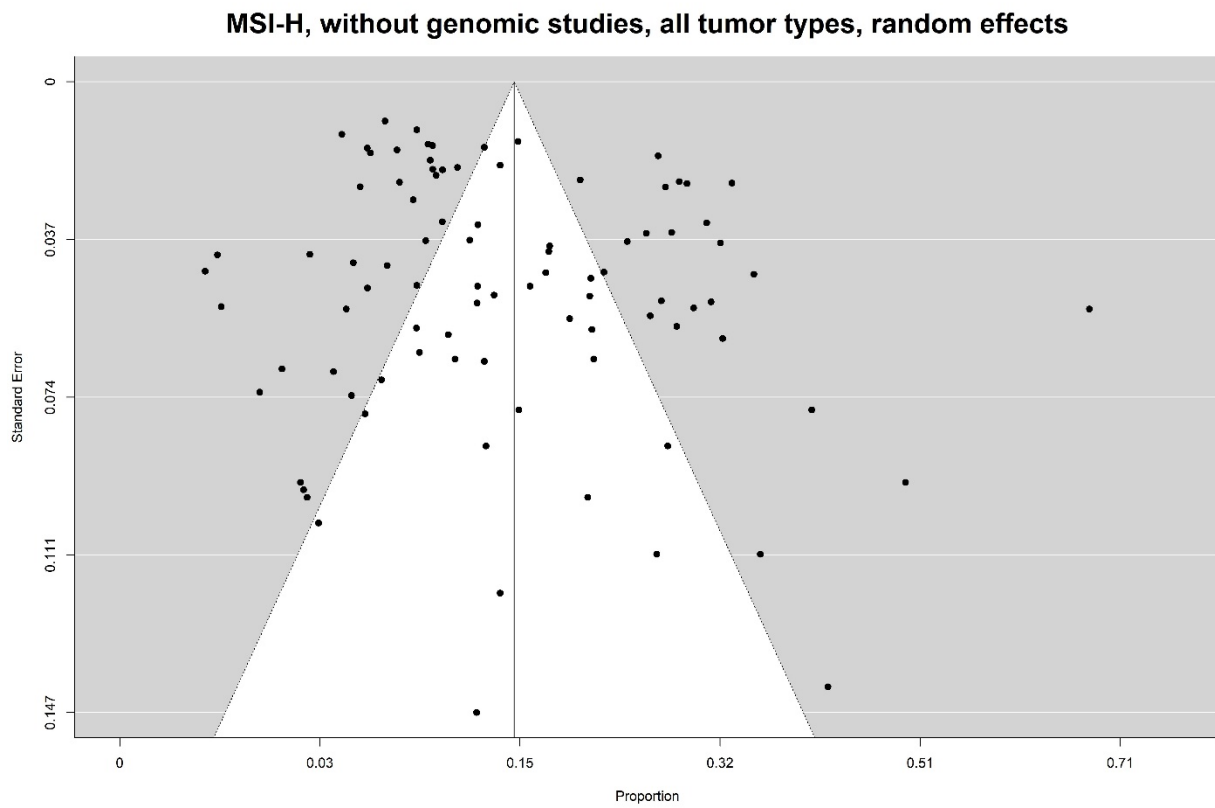

**Appendix Figure 28: Funnel plot, MSI-H, all tumor types, overall (with genomic studies)**

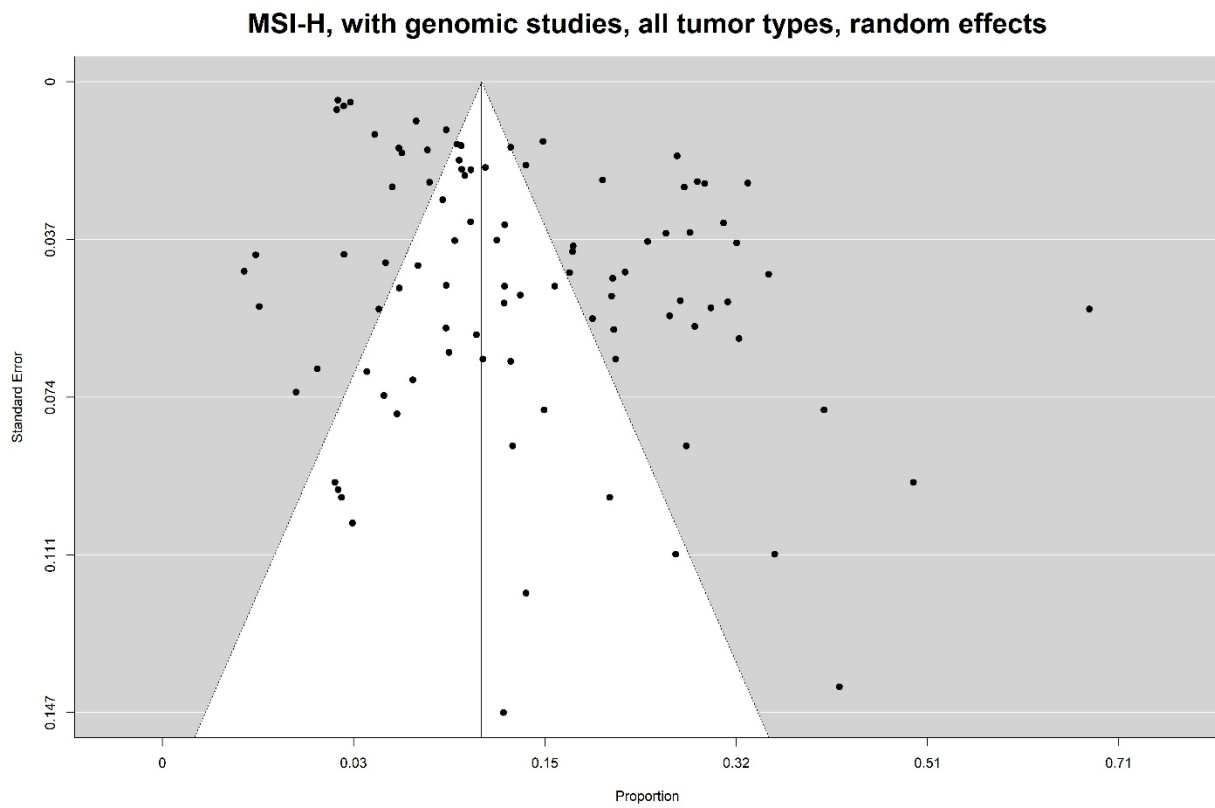

**Appendix Figure 29: Funnel plot, MSI-H, all tumor types, United States**

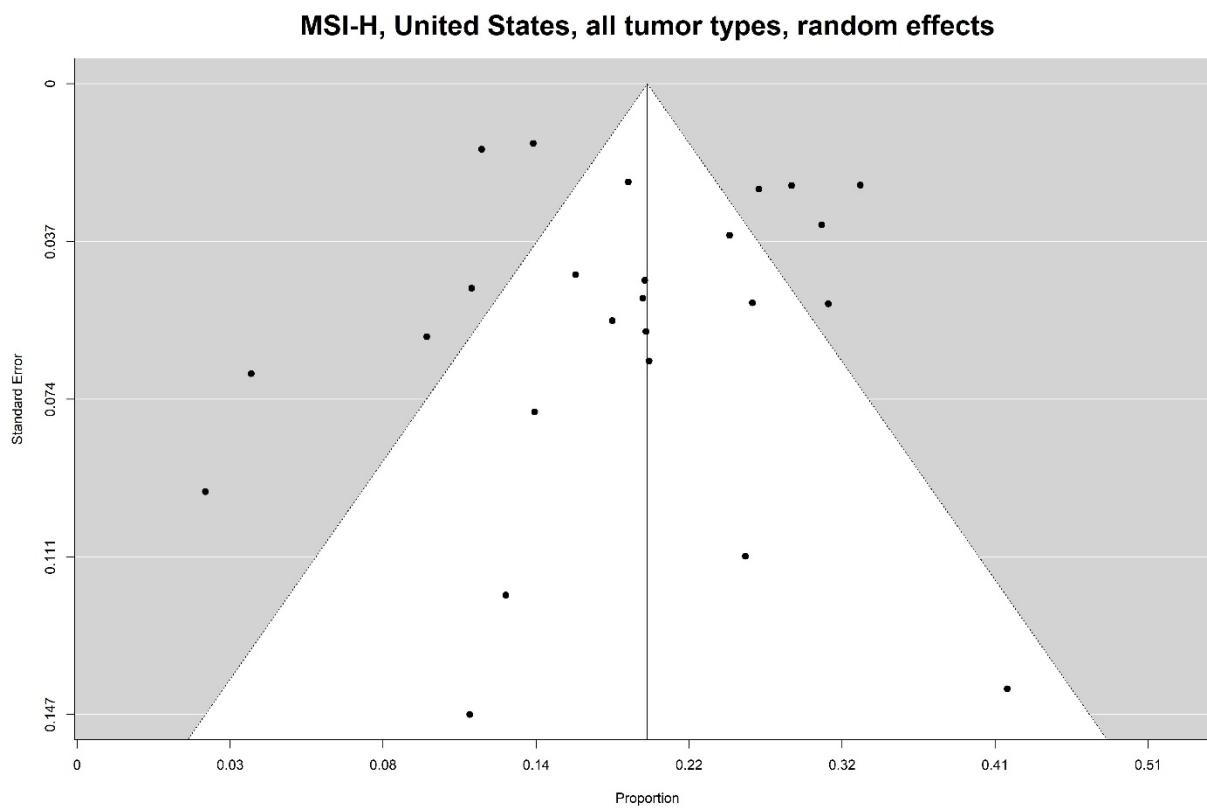

Appendix Figure 30: Funnel plot, MSI-H, all tumor types, Korea

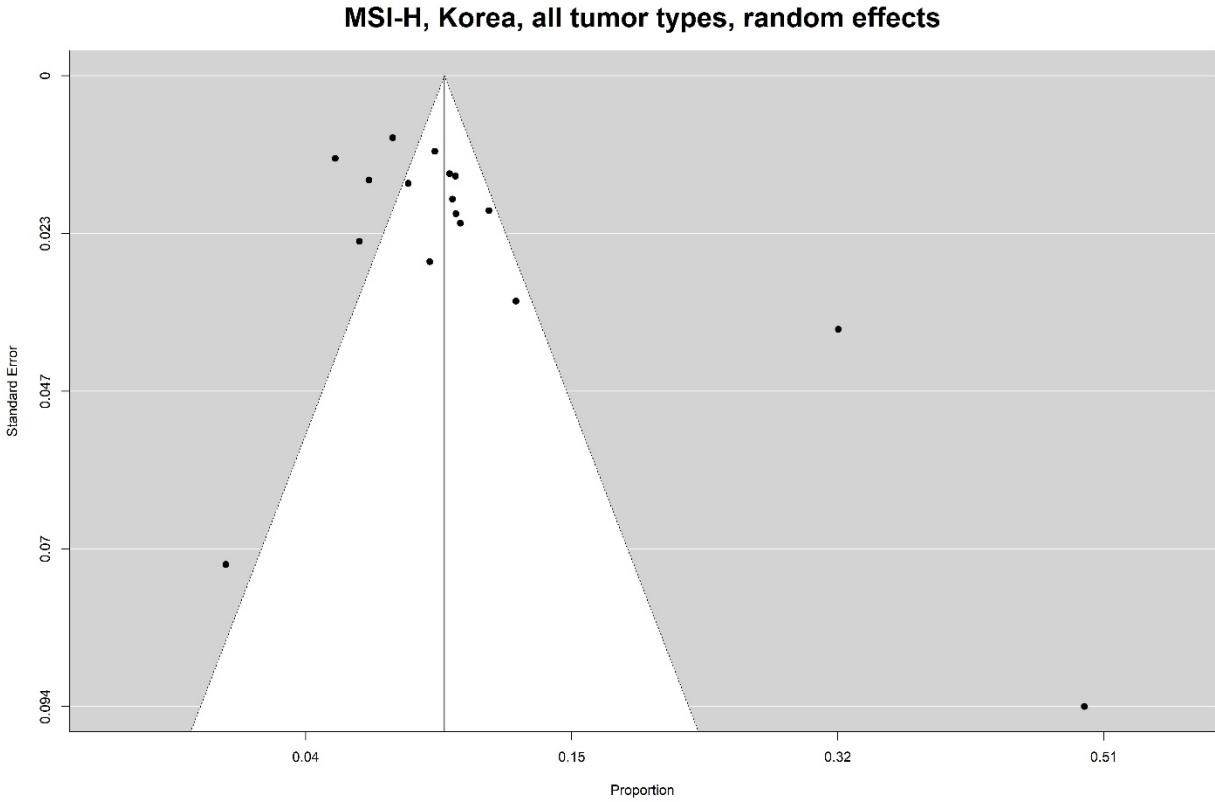

Appendix Figure 31: Funnel plot, MSI-H, all tumor types, Japan

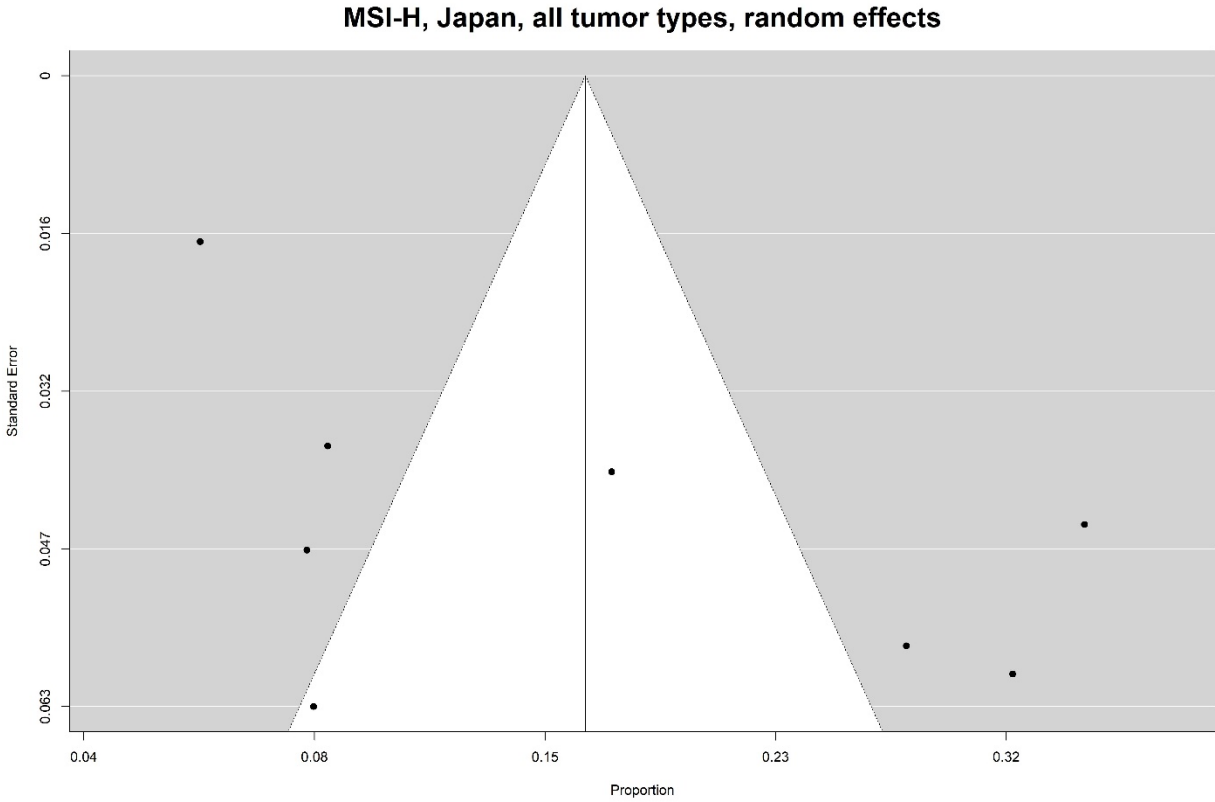



Appendix Figure 32: Funnel plot, MSI-H, all tumor types, stage 1

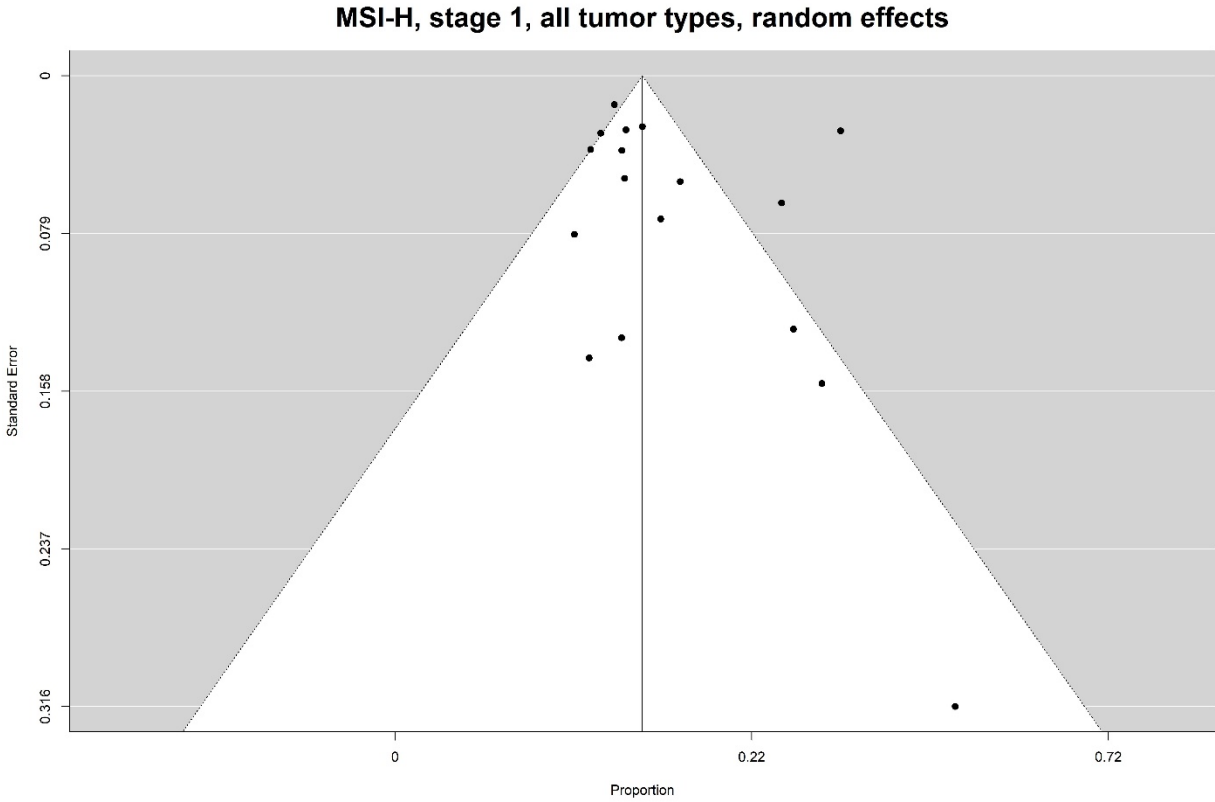

Appendix Figure 33: Funnel plot, MSI-H, all tumor types, stage 2

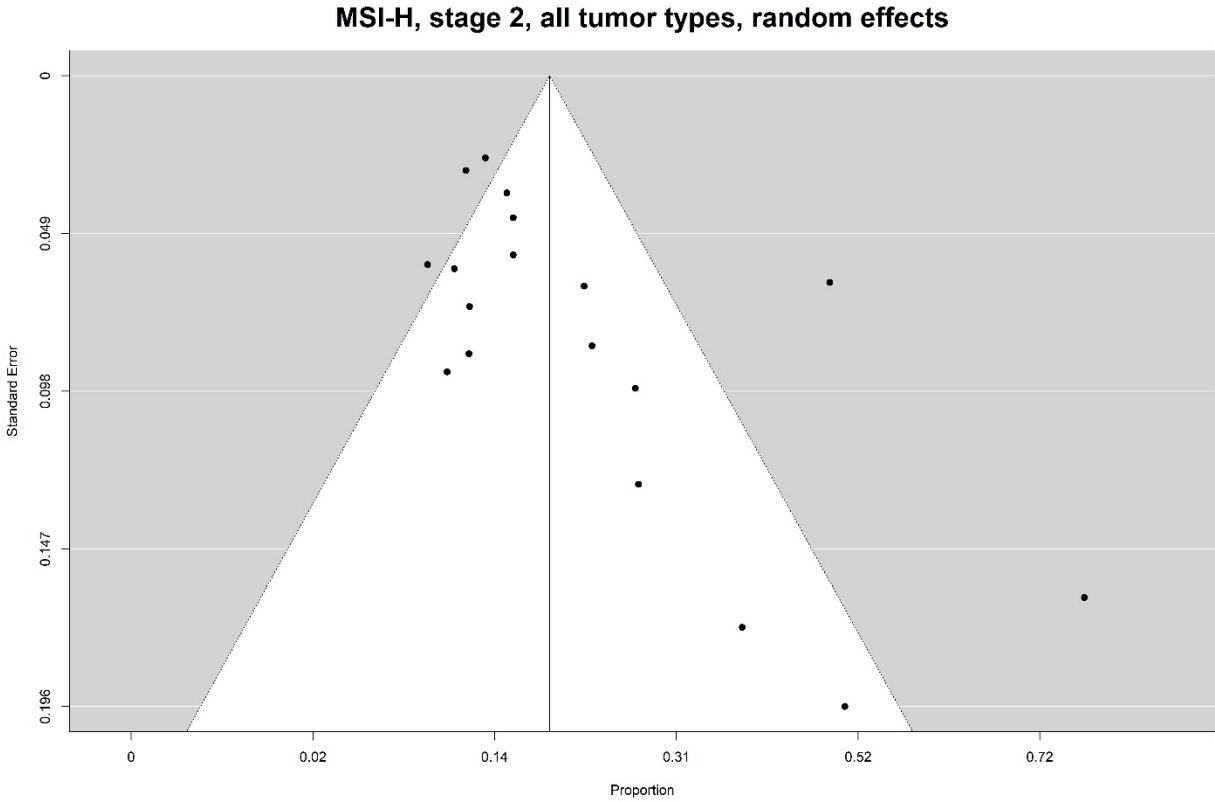

Appendix Figure 34: Funnel plot, MSI-H, all tumor types, stage 3

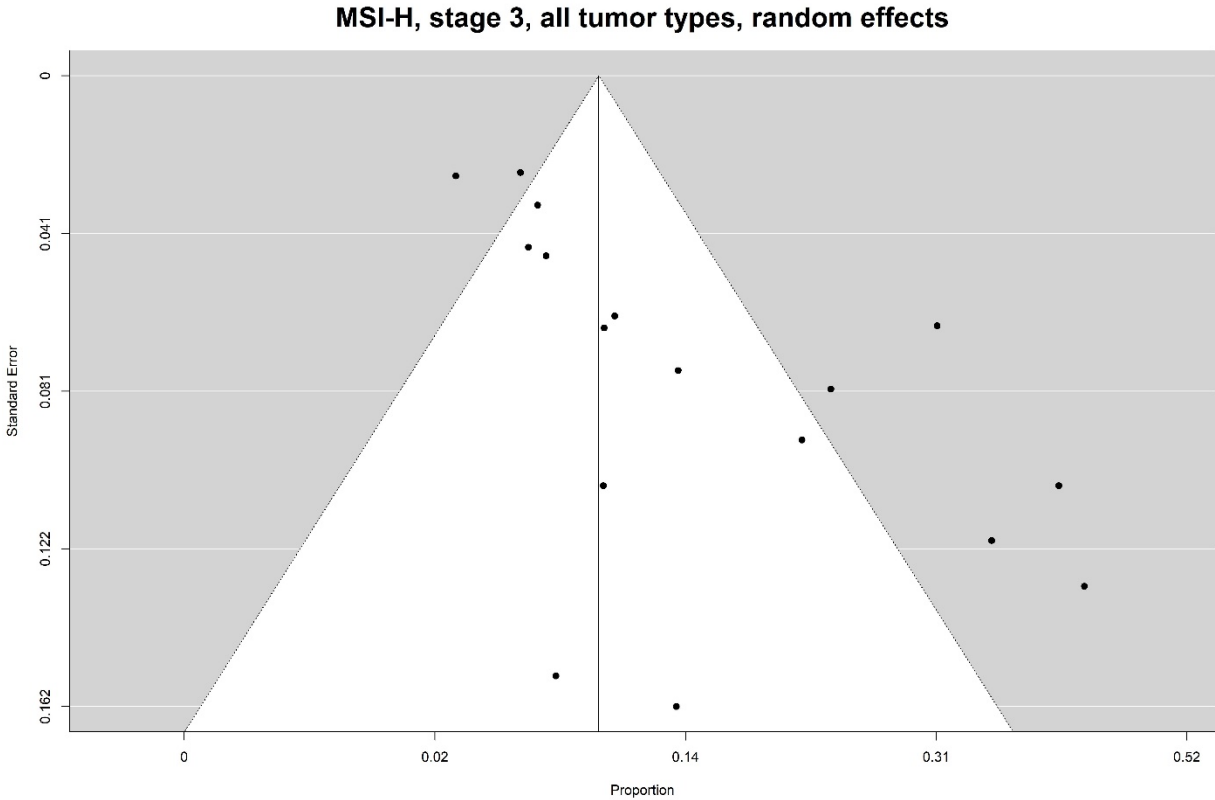

Appendix Figure 35: Funnel plot, MSI-H, all tumor types, stage 4

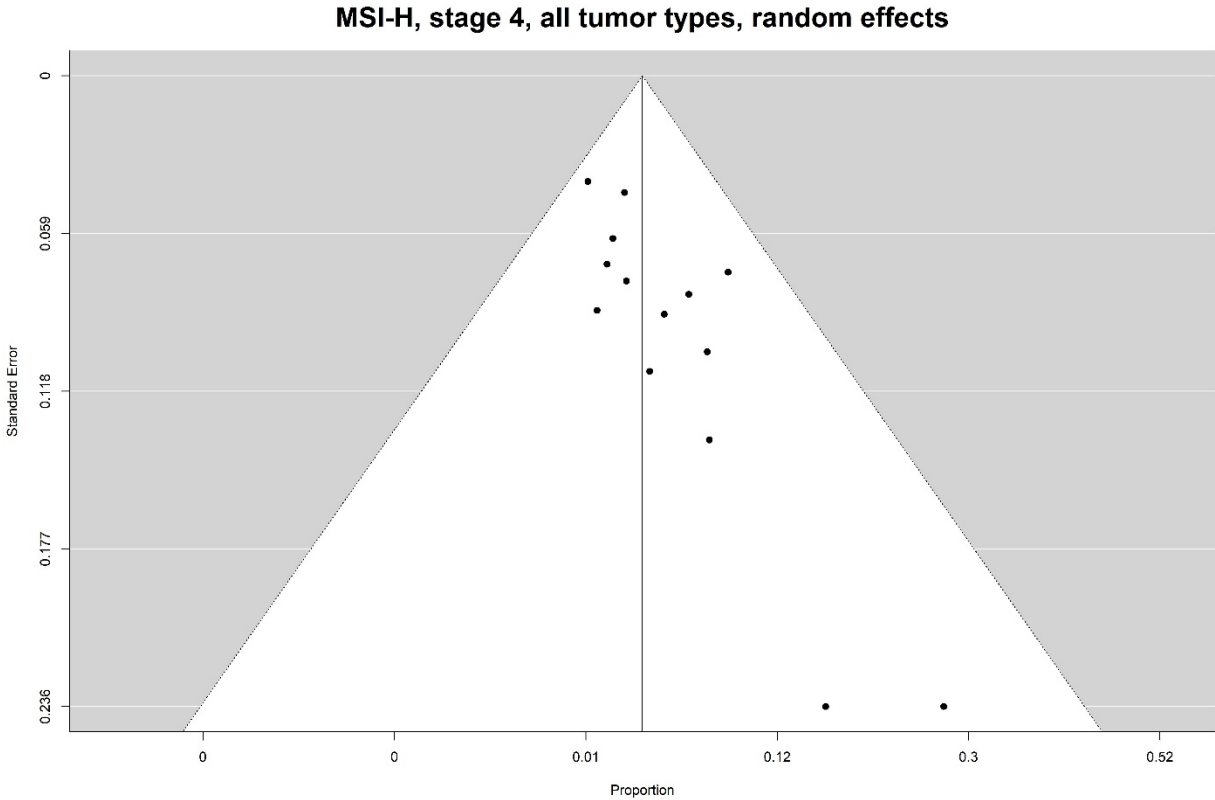

Appendix Figure 36: Funnel plot, MSI-H, all tumor types, stage 1-2

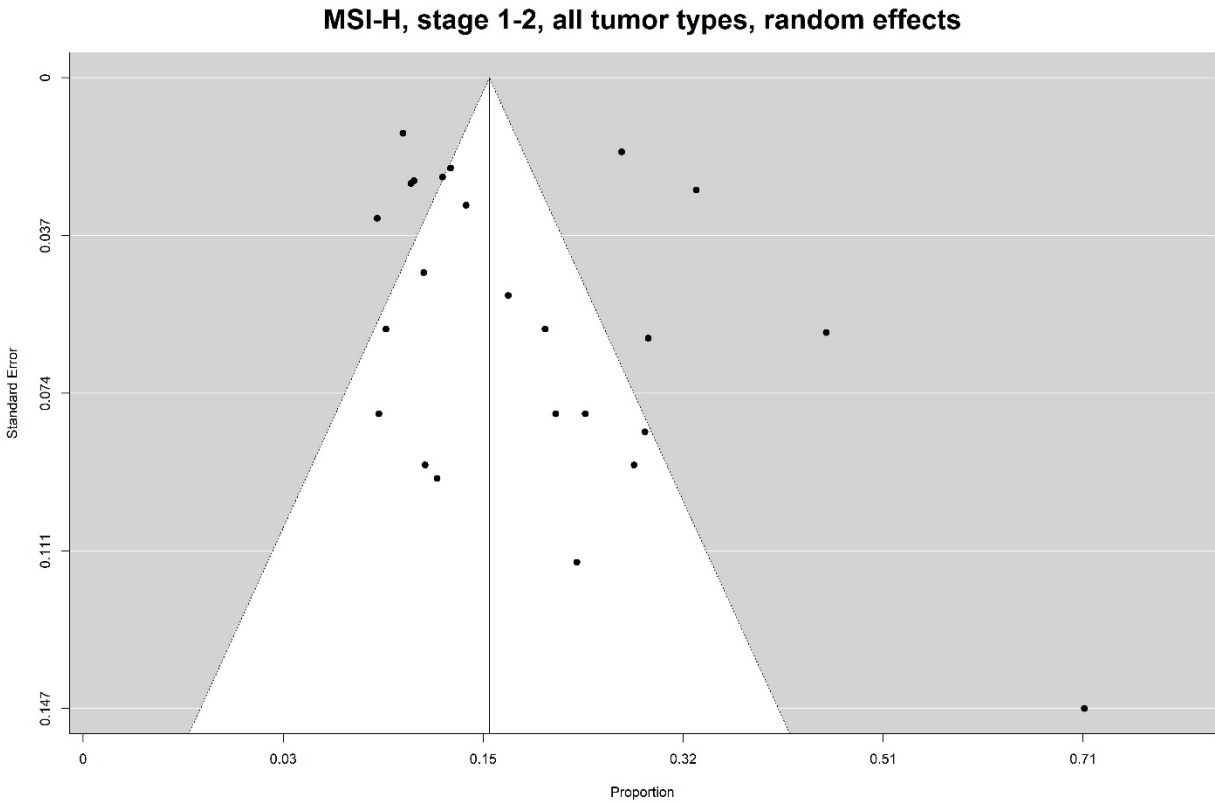

Appendix Figure 37: Funnel plot, MSI-H, all tumor types, stage 3-4

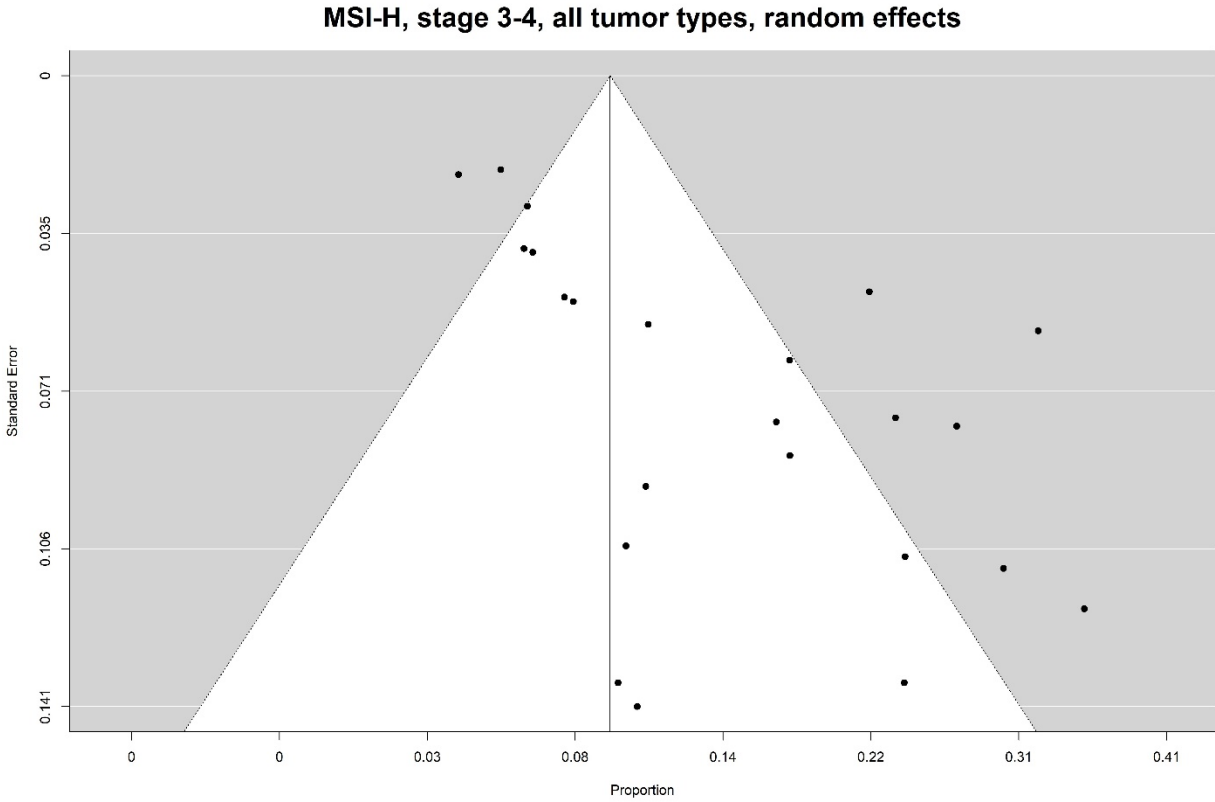

Appendix Figure 38: Funnel plot, dMMR, all tumor types, overall

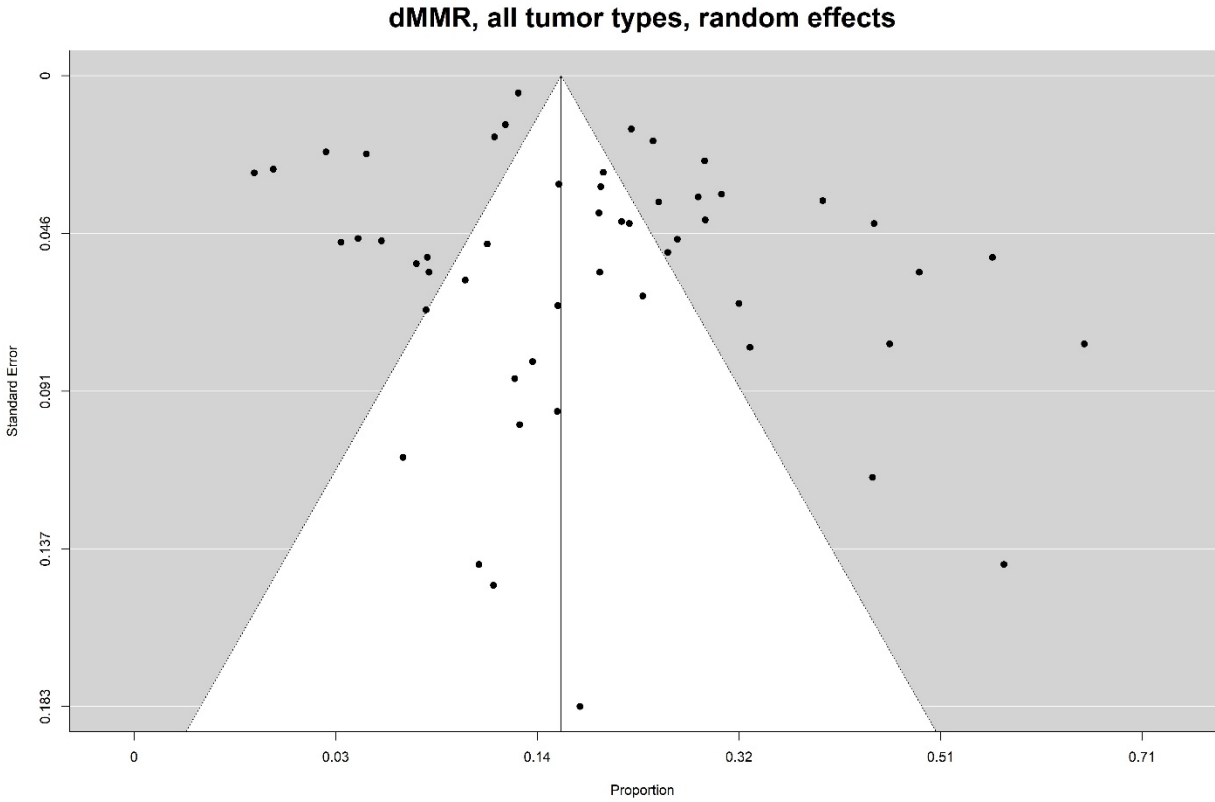



**Appendix Figure 39: Funnel plot, dMMR, all tumor types, overall (sensitivity)**

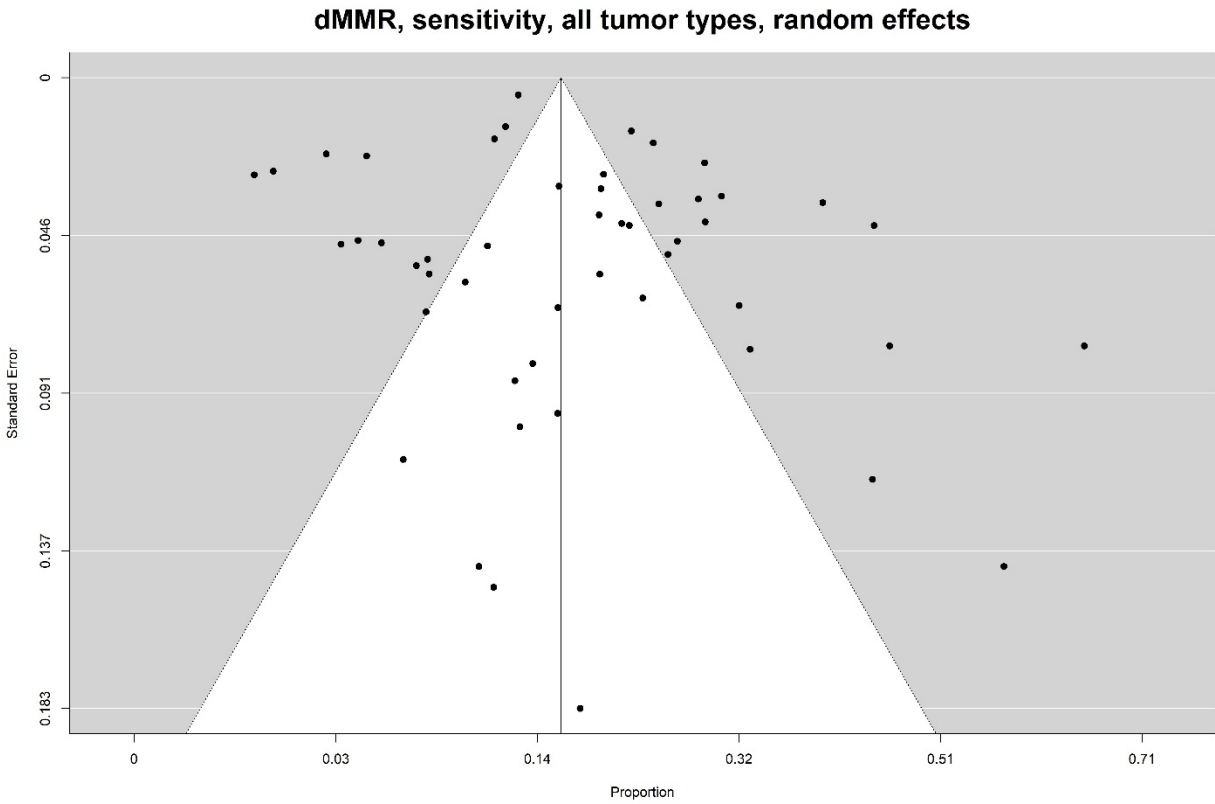

**Appendix Figure 40: Funnel plot, dMMR, all tumor types, United States**

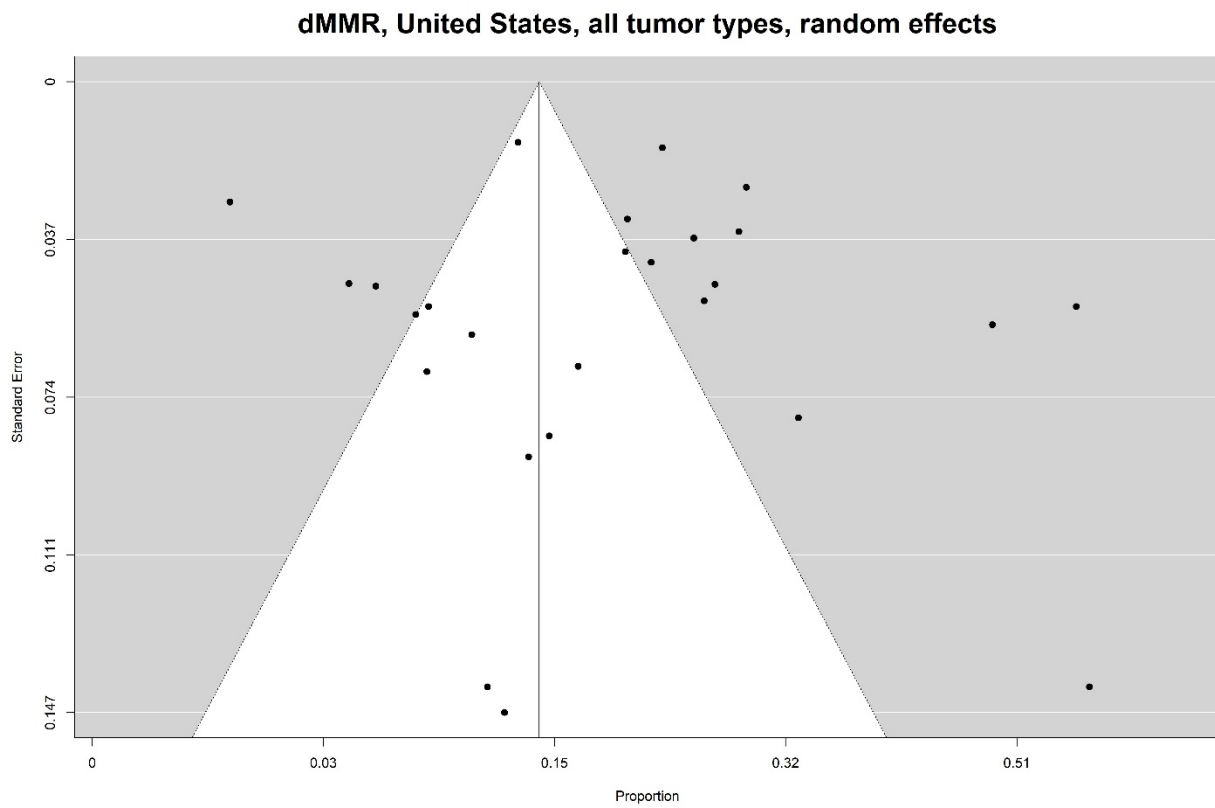

**Appendix Figure 41: Funnel plot, dMMR, all tumor types, United States (sensitivity)**

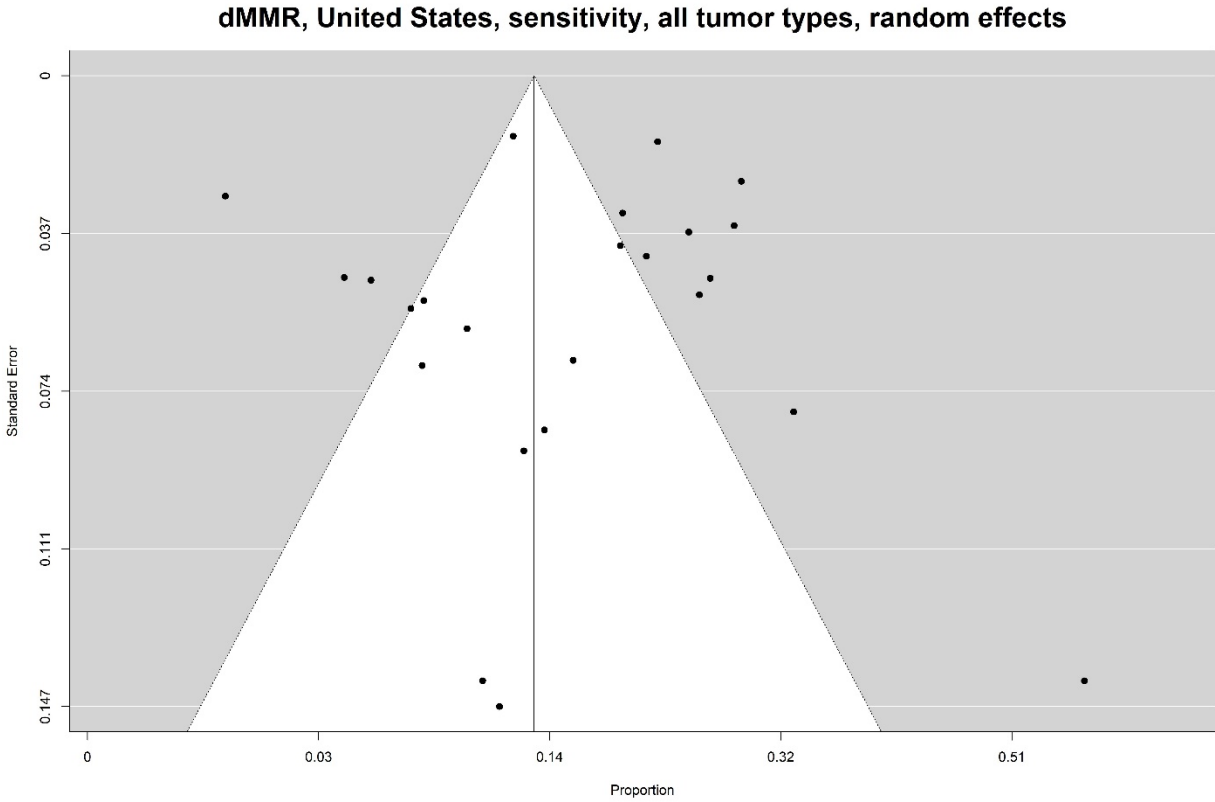

**Appendix Figure 42: Funnel plot, MSI-H/dMMR, all tumor types, overall (without genomic studies)**

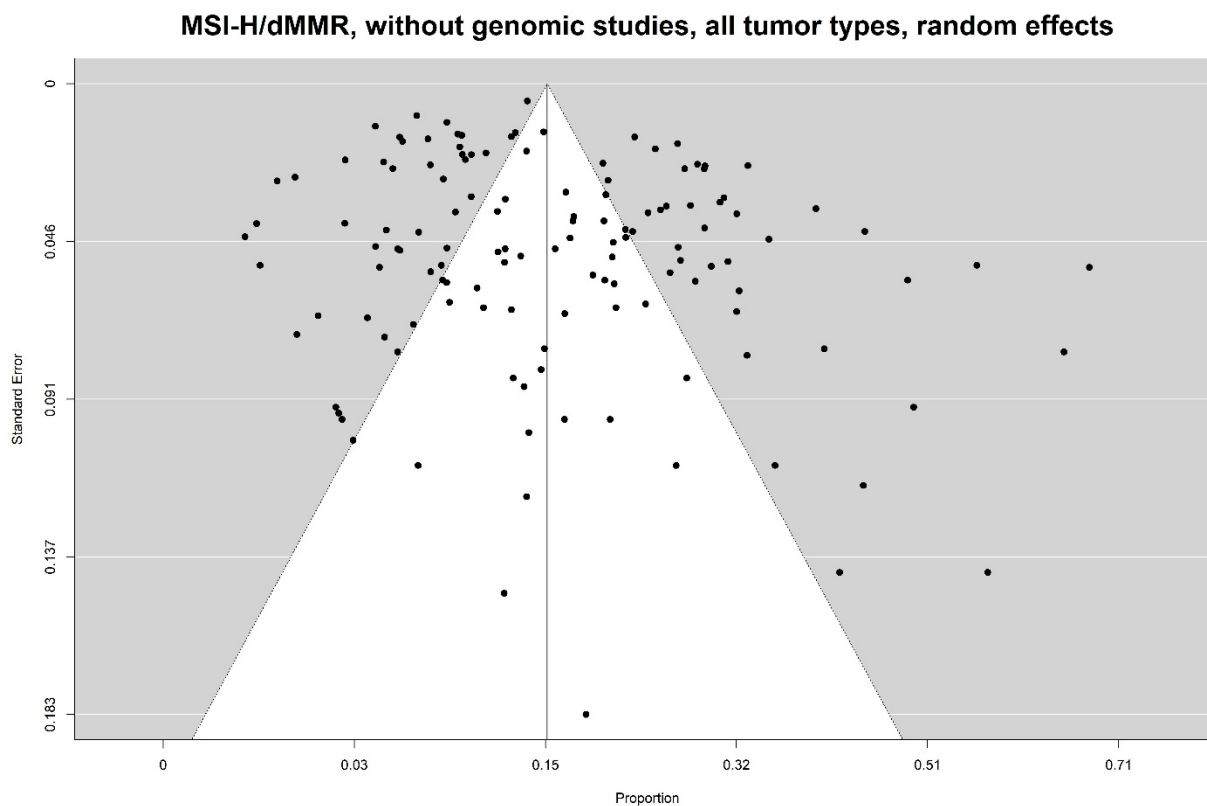

**Appendix Figure 43: Funnel plot, MSI-H/dMMR, all tumor types, overall (with genomic studies)**

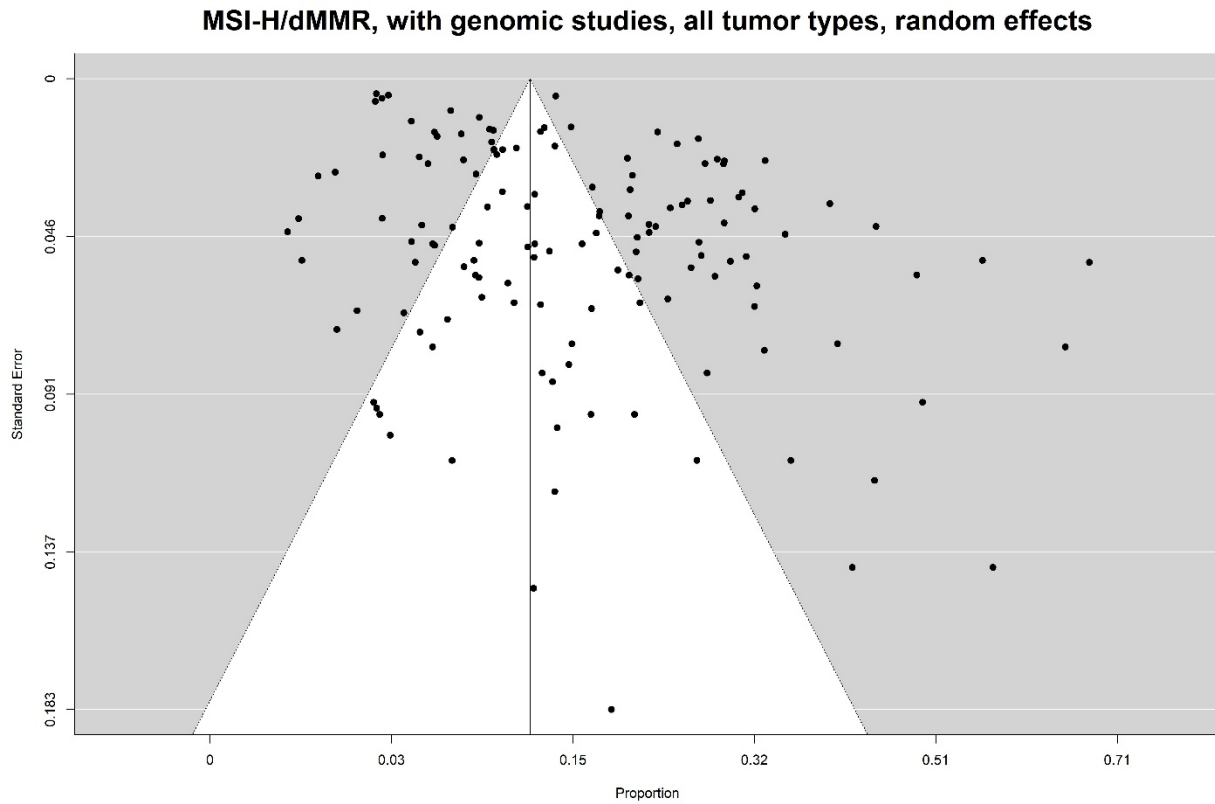

**Appendix Figure 44: Funnel plot, MSS, all tumor types, overall**

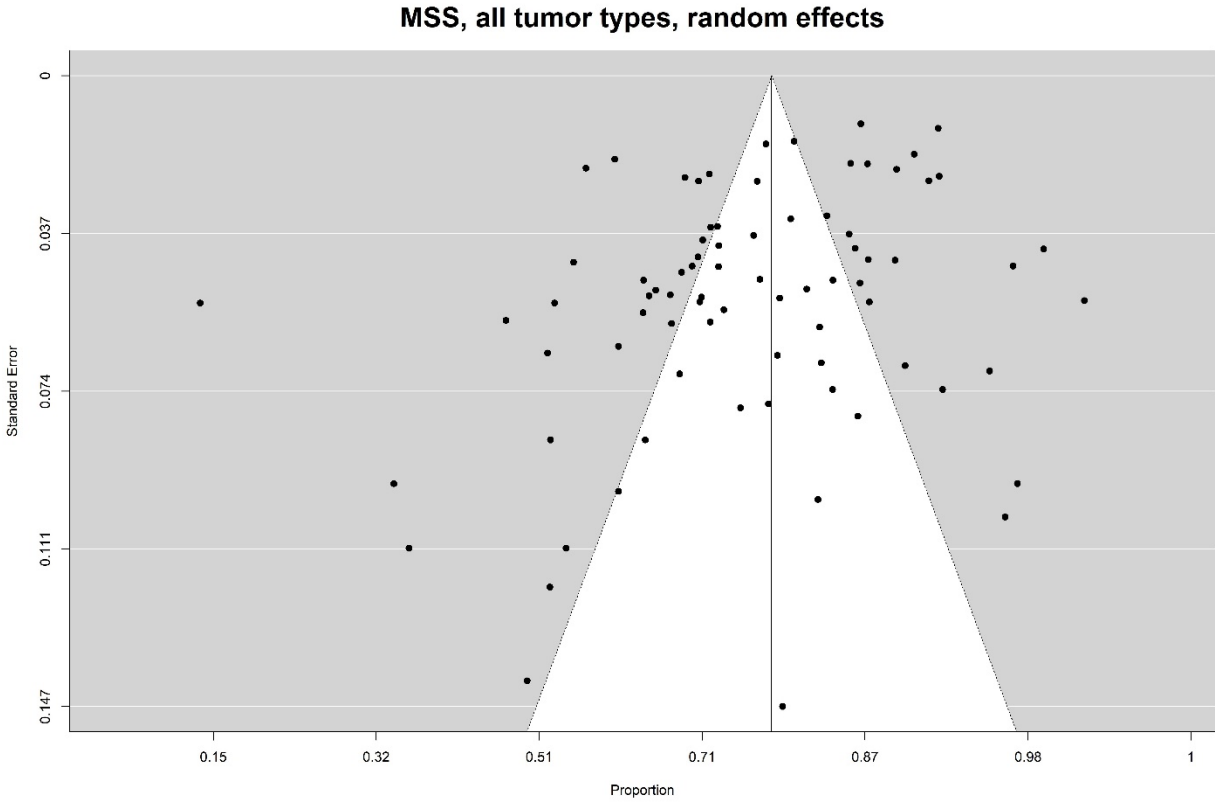

Supplement: f1 [file 1807929.f1.pdf]
